# Supplementary material for: Reshoring silicon photovoltaics manufacturing contributes to decarbonization and climate change mitigation
Source: Springer Nature journal article supplement (doi:10.1038/s41467-023-36827-z), 2023-03-08
Supplement: MOESM1 [file 41467_2023_36827_MOESM1_ESM.pdf]

Supplementary Materials for

# **Reshoring silicon photovoltaics manufacturing contributes to decarbonization and climate change mitigation**

Haoyue Liang<sup>1</sup>, Fengqi You<sup>1,2,3\*</sup>

<sup>1</sup> Systems Engineering, College of Engineering,  
Cornell University, Ithaca, New York 14853, USA

<sup>2</sup> Robert Frederick Smith School of Chemical and Biomolecular Engineering,  
Cornell University, Ithaca, New York 14853, USA

<sup>3</sup> Cornell Atkinson Center for Sustainability,  
Cornell University, Ithaca, New York 14853, USA

---

\* Corresponding author. Phone: (607) 255-1162; Fax: (607) 255-9166; Email: [fengqi.you@cornell.edu](mailto:fengqi.you@cornell.edu)

**This PDF file includes:**

Supplementary Text

Supplementary Figures 1 to 11

Supplementary Tables 1 to 5

### **Supplementary Note 1: Supply chain and trade data**

The trade data for solar were collected from USITC DataWeb, the premium source of U.S. merchandise trade and tariff data<sup>1</sup>. All trade data are compiled from official data retrieved from the U.S. Bureau of the Census, an agency within the U.S. Department of Commerce, and can be obtained monthly, quarterly, annual, or year-to-date. From USITC DataWeb, the data can be retrieved using a sophisticated querying tool, demonstrating detailed data in various classification systems, including the Harmonized Tariff Schedule (HTS), the primary tool applied for data search in this study. We first performed HTS (2021 basic revision 12) search on PV and examined article descriptions of "photosensitive semiconductor devices, including photovoltaic cells whether or not assembled into modules or made up into panels." We also referred to the ruling references on tariff classification in customs rulings online search system (CROSS) from U.S. Customs and Border Protection regarding solar module HTS codes.

Based on the ruling references provided in CROSS and our search results from USITC, we selected one HTS code that most closely represents the commodity we study. An HTS code of 8541.40.6015 representing c-Si PV cells of a thickness equal to or greater than 20 mm assembled into modules or panels clearly provided us with the trade information regarding c-Si PV that we need, although more subdivisions for the type of c-Si are not available. Since the supply chain structure was needed for cases 2010 to 2020, we set the trade flow to be general imports to the U.S. Various types of different measures of the data can be obtained, including (1) customs value defined as the price paid or payable for merchandise excluding import duties, etc., (2) units of quantity used for tariff or quota purposes, (3) cost, insurance, and freight (CIF) import value, the landed value at the first portal of arrival excluding U.S. import duties, and so on. All types of measures every year from 2010 to 2020 were selected (Supplementary Fig. 1), and the timeframe aggregation was set to monthly to gain more comprehensive insights. The exporting regions were displayed separately, while rate provision codes and districts were aggregated. The trade data corresponding to c-Si PV cells was only available for years after 2018. Since there is no data available for the 2010 case and 2015 case using the former HTS code representing c-Si PV commodities, we selected another HTS code 8541.40.6020, representing solar cells assembled into modules or panels without the type of solar cells specified. The corresponding trade data were available before 2018, which were the best available data for benchmark cases. The maps with HTS code and the PV panel import flows are presented in Supplementary Fig. 2.



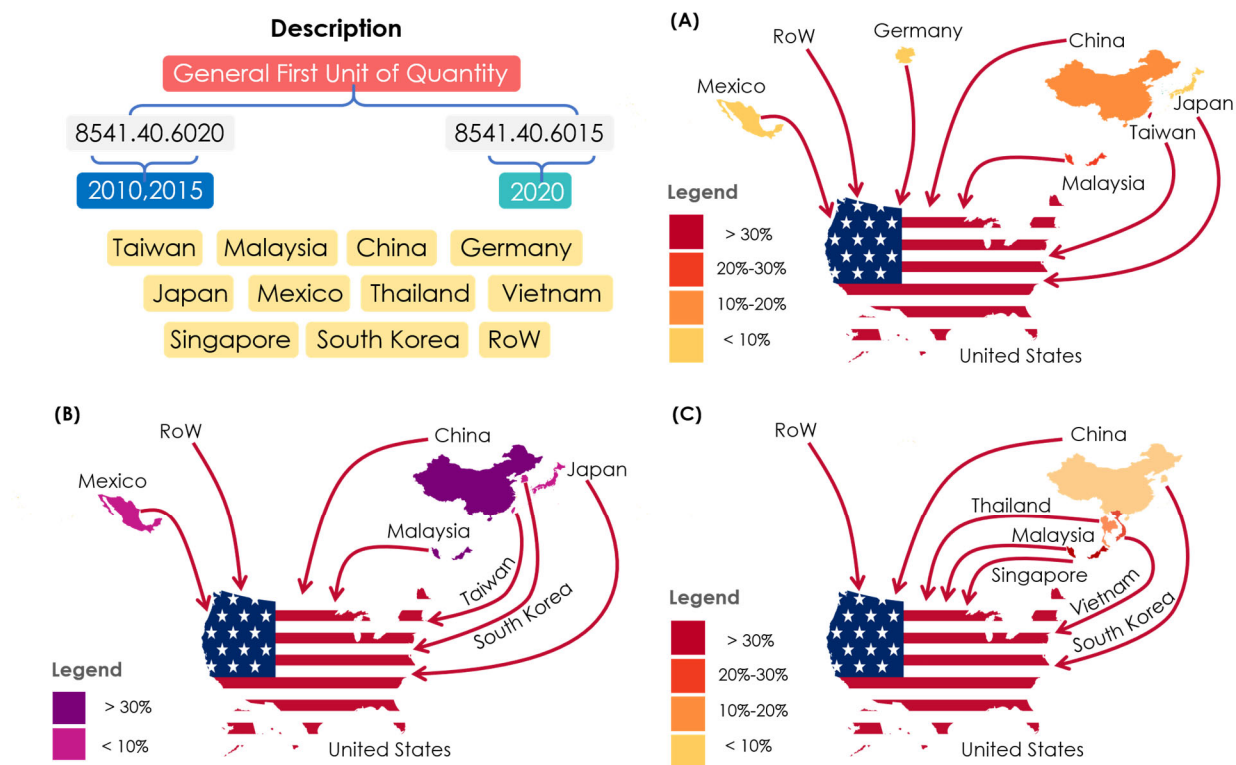

Supplementary Fig. 2 Supply chain of c-Si PVs shipped from global regions to the U.S. in 2010 and 2015 from HTS code 8541.40.6020 (as shown in panel (A) corresponding to 2010 and panel (B) representing 2015), and in 2020 from HTS code 8541.40.6015 (as shown in panel (C)), with market shares color-coded.

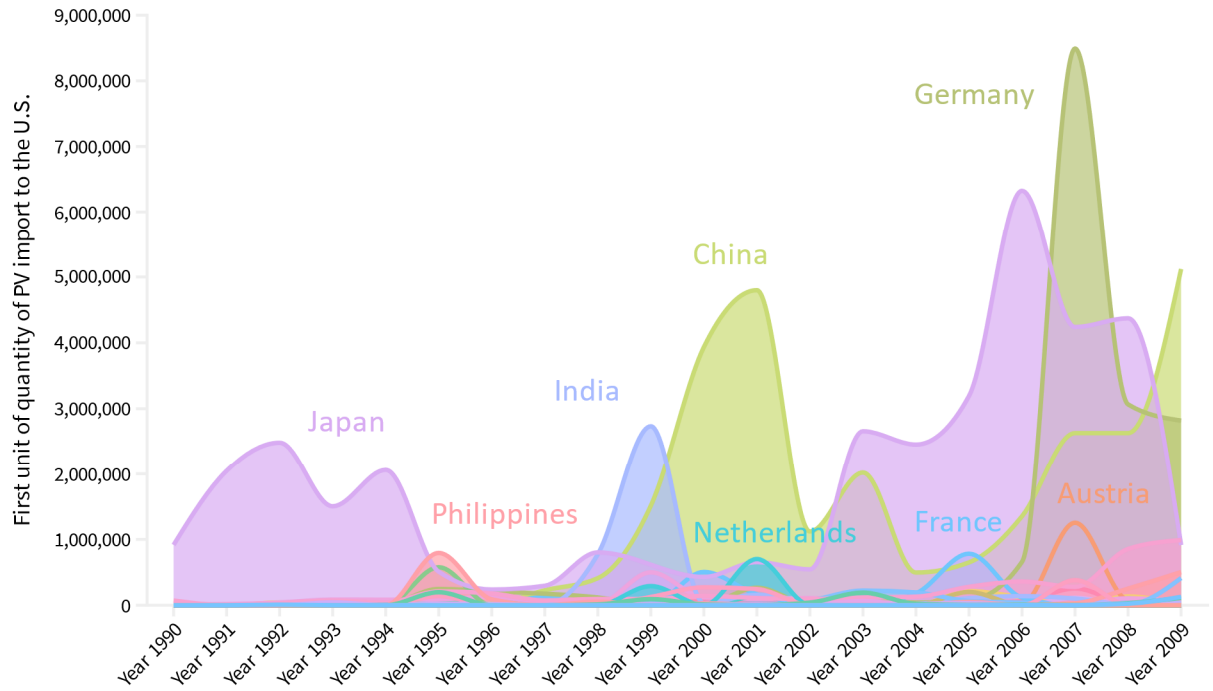

Supplementary Fig. 3 Supply chain of PVs shipped from global trading partners to the U.S. from 1990 to 2009. The supply chain structure is derived from the general first unit of quantity data from 1990 to 2009 using HTS code 8541.40.6020.

## Supplementary Discussion 1: Manufacturing vs operations and maintenance vs end-of-life treatment

The GHG emissions from the use stage contributes to less than 0.20% of PV lifetime emissions, and those from the end-of-life management stage contributes to less than 0.41%, as shown in Supplementary Fig. 4. The energy use from the use stage contributes to less than 2.0% of lifetime energy use, and that from the end-of-life management stage contributes to less than 3.0%. Since most carbon emissions occur in the upstream manufacturing process, and contributions of emissions from the use stage and the disposal stage are generally low.

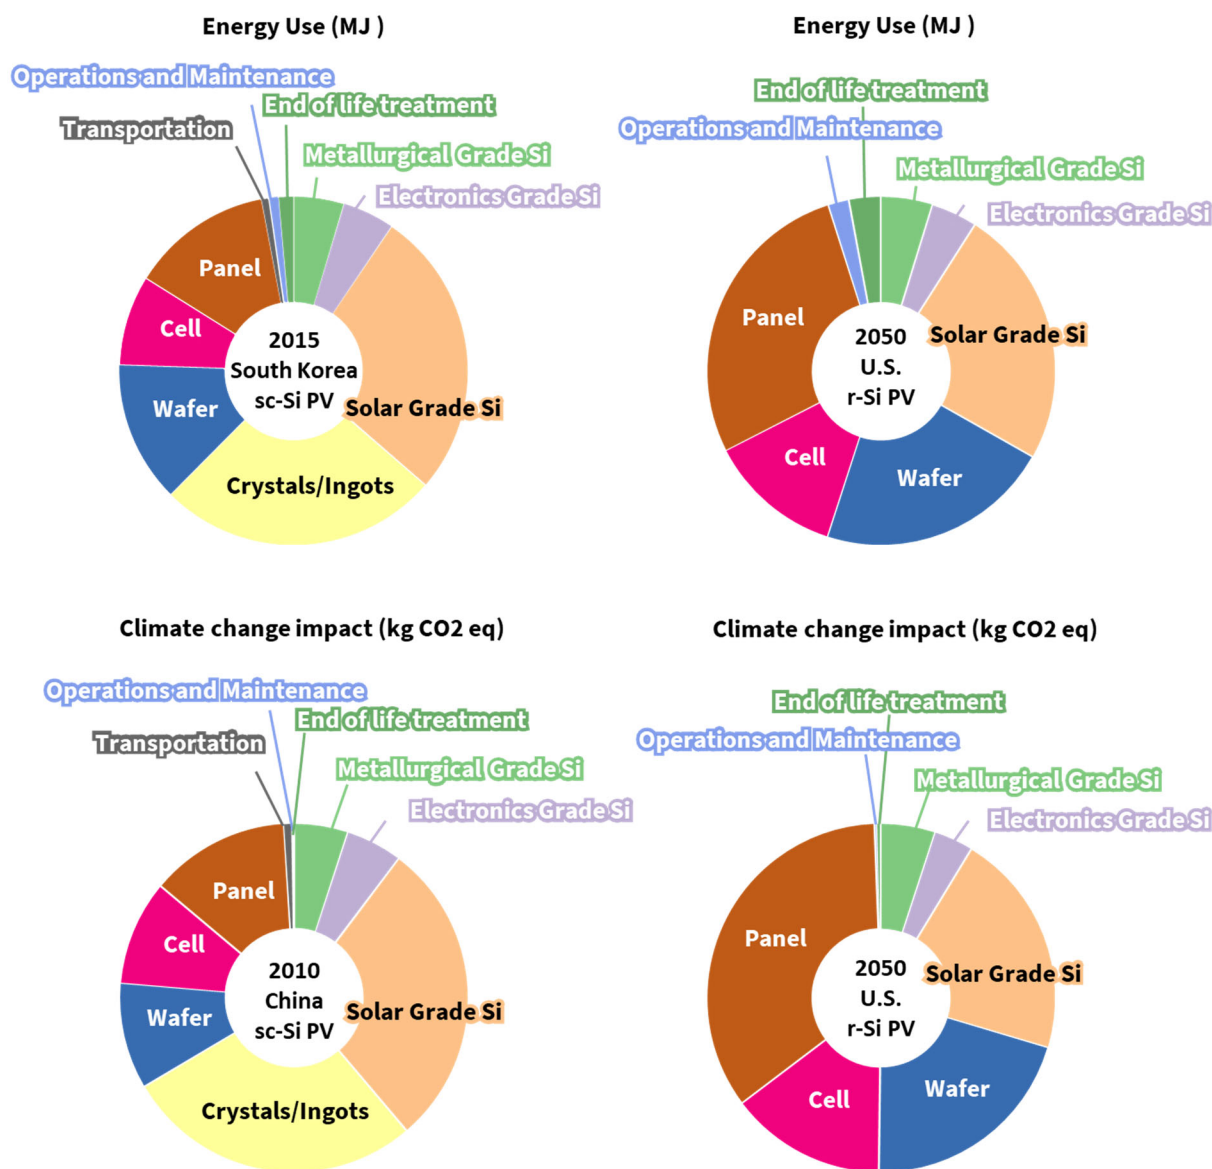

Supplementary Fig. 4 Energy use and climate change impact from the manufacturing stage compared against the operations and maintenance stage, and the end-of-life treatment stage. Among all manufacturing locations, PV technologies, and temporal variations, South Korea in 2015 used 5244.6 MJ

energy to manufacture sc-Si PV, the highest among all. On the other hand, among all cases and scenarios, the U.S. is projected to use the least amount of energy to manufacture r-Si PV panels in 2050. Despite the dramatic difference between the highest and lowest energy use from the PV manufacturing stage discussed in this study, the energy use of the operations and maintenance stage contributes to less than 2.0% of lifetime energy use, and the end-of-life treatment stage contributes to less than 3.0%. Similarly, the GHG emissions from manufacturing sc-Si PV in China in 2010 are the highest, while the emissions from manufacturing r-Si PV panels in the U.S. in 2050 are projected to be the lowest. Regardless of the cases and scenarios, the climate change impact from the use stage contributes to less than 0.20% of overall emissions, and the disposal stage contributes to less than 0.41%.

### **Supplementary Discussion 2: Counterfactual scenario in 2035**

The energy use and climate change impact in 2035 compared to in 2020 if the trading partners and their supply shares remain unchanged have also been investigated. The comparison between the 2020 offshore manufacturing case and the 2035 counterfactual scenario provides insights into how the dynamic energy mix influences the energy and environmental impacts of solar panel manufactured at outsourced locations, given that the supplies from trading partners remain unchanged. The counterfactual scenario in 2035 show that if the U.S. continues to rely on the same trading partners as in 2020, the energy use and GHG emissions from panel manufacturing would be reduced by 4% and 13% as shown in Supplementary Fig. 5.

From Supplementary Fig. 1 for data regarding solar panel trading partners and their market shares from 2010 to 2020 and Supplementary Fig. 3 showcasing the fluctuating data regarding panel importers from 1990 to 2009, the supply chain structure for the past 30 years is highly dynamic with continuous fluctuations. The supply chain structure can be easily influenced by geopolitical issues. Due to the uncertainties arising from these issues, long term projections of the economic and supply chain structures could have large error bars. As a result, following the trajectory and current policy agenda, multiple likely reshored manufacturing scenarios are the main focus in this study.



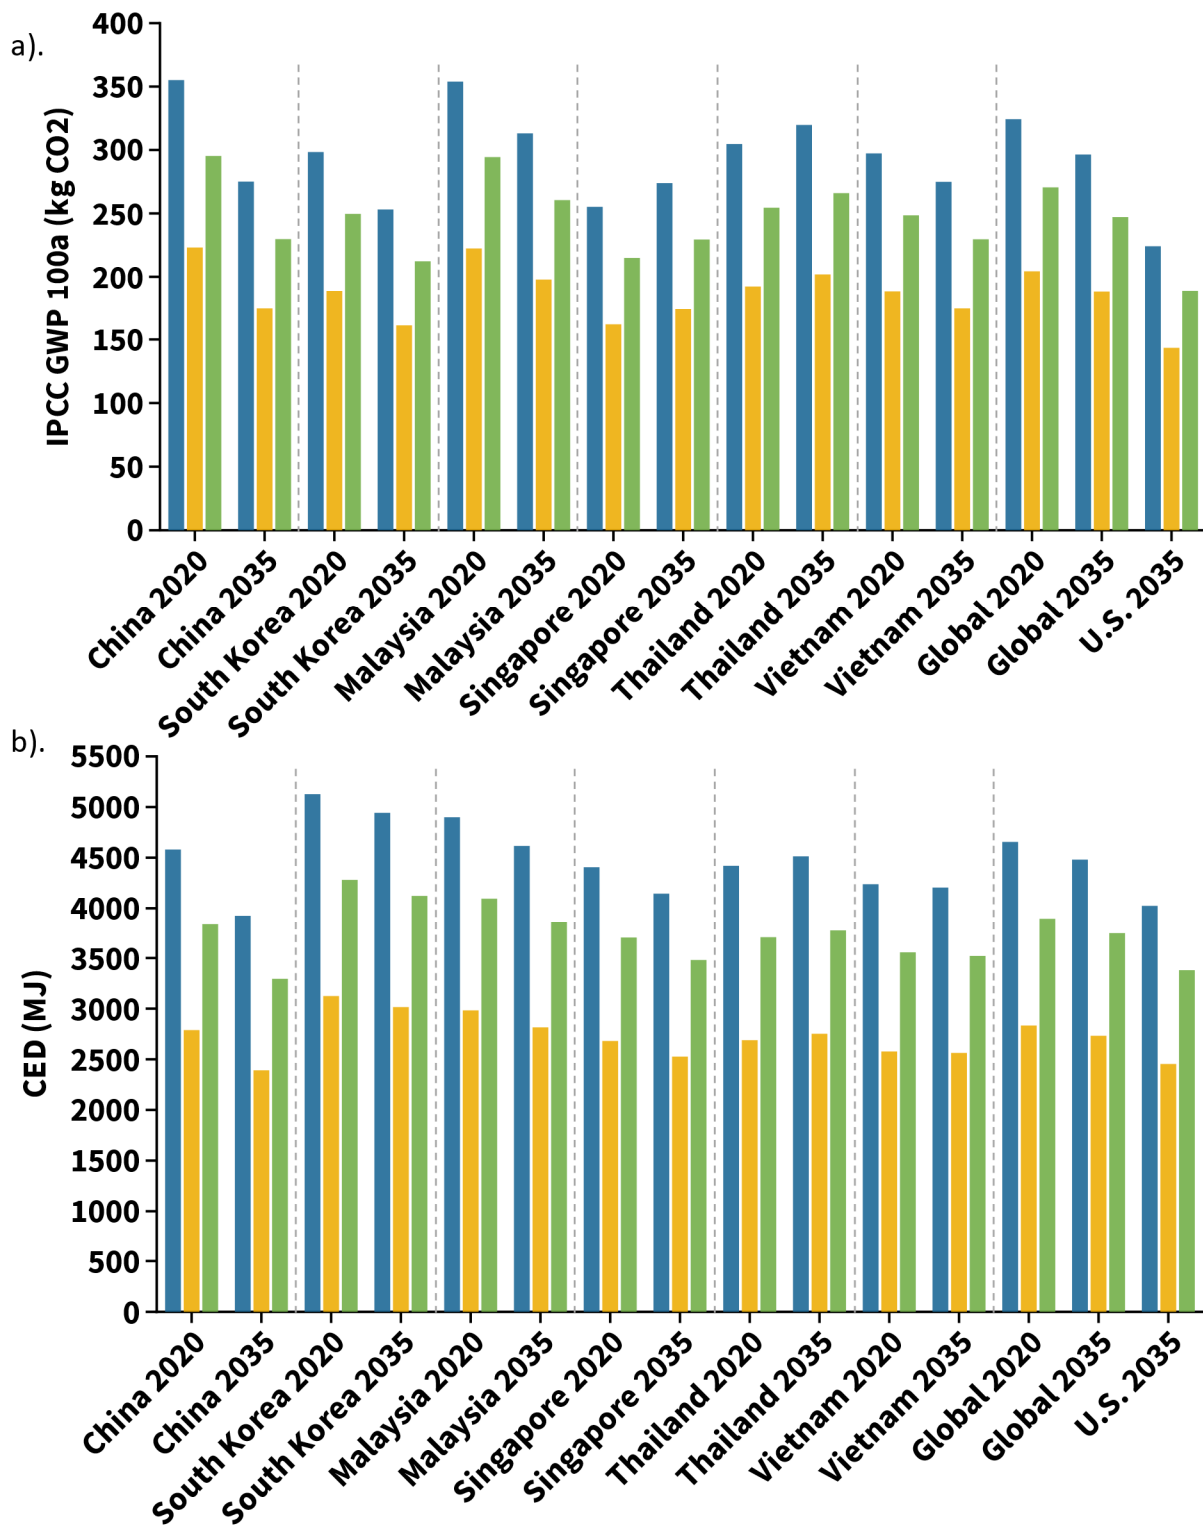

Supplementary Fig. 5 Energy use and climate change impact results of the 2035 counterfactual scenario using the current supply chain structure (trading partners in the 2020 case: China, South Korea, Malaysia, Singapore, Thailand, and Vietnam) and the global energy mix projection in 2035, in comparison with the

2020 offshore manufacturing case and the 2035 reshored manufacturing scenario. The figures show reductions in climate change impact (panel **a**) and energy use (panel **b**) in 2035 compared to in 2020 if the trading partners and their supply shares remain unchanged. Global offshore manufacturing scenario in 2035 (counterfactual scenario) results in a less than 4% reduction in energy use and a less than 9% reduction in GHG emissions, compared to the 2020 offshore case. However, reshored manufacturing in 2035 results in a 13% reduction in energy use, as well as a 30% reduction in emissions, compared to the same 2020 offshore case.

### **Supplementary Discussion 3: Partially reshored scenarios in 2035**

Apart from the fully reshored scenario and counterfactual scenario in 2035, partially reshored scenarios are also taken into account in this study. There is a chance that the U.S. might not be fully equipped to bring PV manufacturing back completely<sup>2,3</sup>. Instead of fully reshoring PV panel production, achieving a greater share of U.S. production that is less than 100% is also possible. We thus study the energy and environmental impacts of three examples of partially reshored scenarios, of which the U.S. supplies 25%, 50%, and 75% of its own PV panels, while relying on the remaining 75%, 50%, and 25% supplies from external sources.

Based on the quantitative results as shown in Supplementary Fig. 6 and Supplementary Fig. 7, party reshored scenario a (25% production from the U.S. and 75% production from global regions) results in 2.5% lower energy consumption and 6% lower emissions, while party reshored scenario b (50% production from the U.S. and 50% production from global regions) results in 5% lower energy use and 12% lower climate change impact, and partially reshored scenario c (75% production from the U.S. and 25% production from global regions) results in less than 8% reduced energy demand and 18% reduced carbon emissions, all compared to the counterfactual scenario (100% production from global regions and no domestic manufacturing) in 2035. Partially reshored scenarios align with the climate change mitigation goal and sustainability target more than the counterfactual scenario in 2035. However, the fully reshored scenario still demonstrates the best energy and environmental performances. Compared with the fully reshored scenario, partially reshored scenarios result in 2.7% to 8.5% higher energy use as well as 7.7% to 24.2% higher carbon emissions.

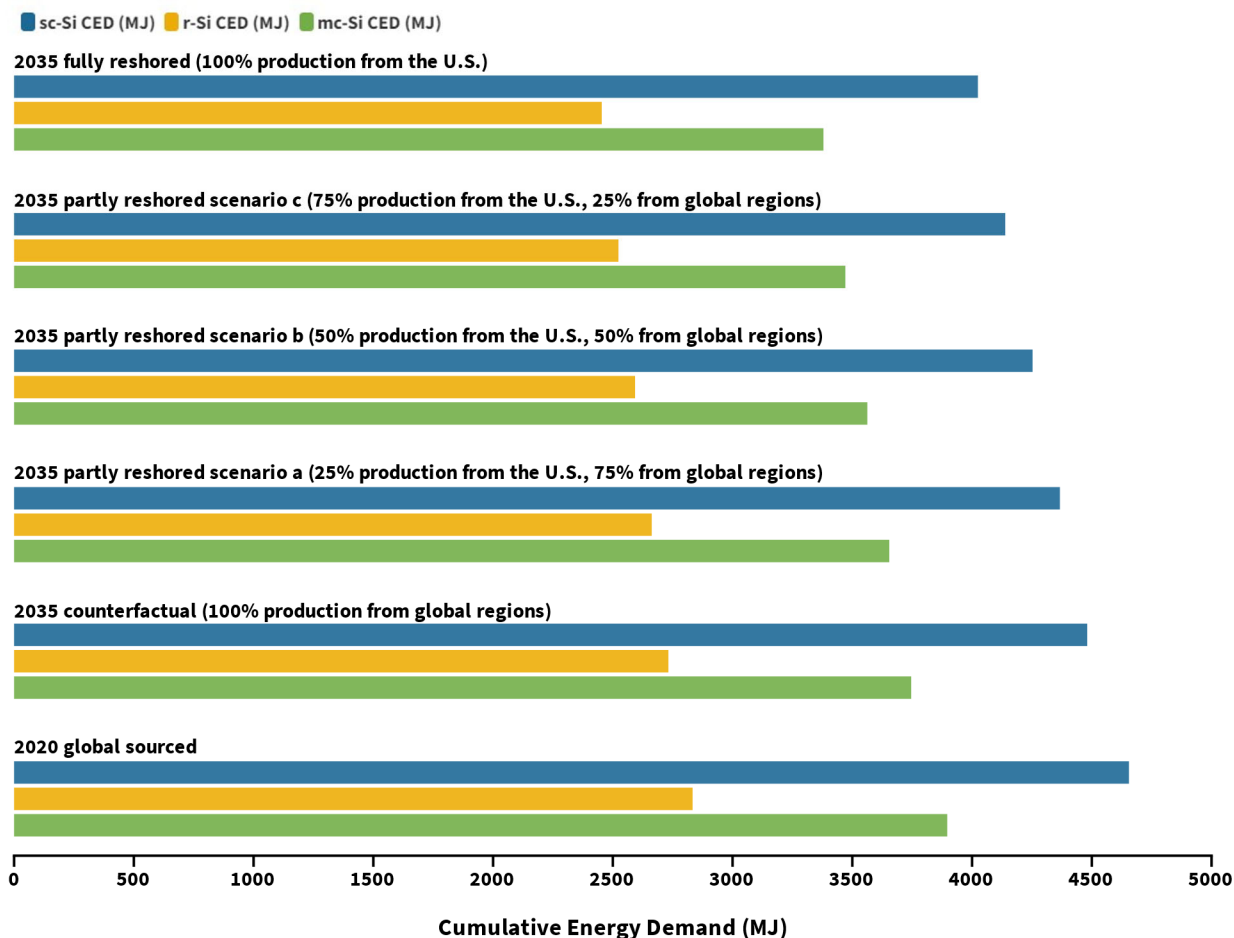

Supplementary Fig. 6 Energy use of partially reshored scenarios in comparison with fully reshored and global sourced scenarios in 2035. It is also likely that instead of achieving fully reshored PV panel manufacturing in the U.S., there might be a greater share of U.S. production that is less than 100%. Here, we formulate three example scenarios of which the U.S. partially reshores PV panel manufacturing (2035 partially reshored scenario a relies on 25% domestic production, 2035 partially reshored scenario b relies on 50% domestic production, and 2035 partially reshored scenario c relies on 75% domestic production. The rest of the PV panels come from global supplies. Partially reshored scenarios result in overall lower energy use than global sourced scenario but higher energy use than fully reshored scenario in 2035.

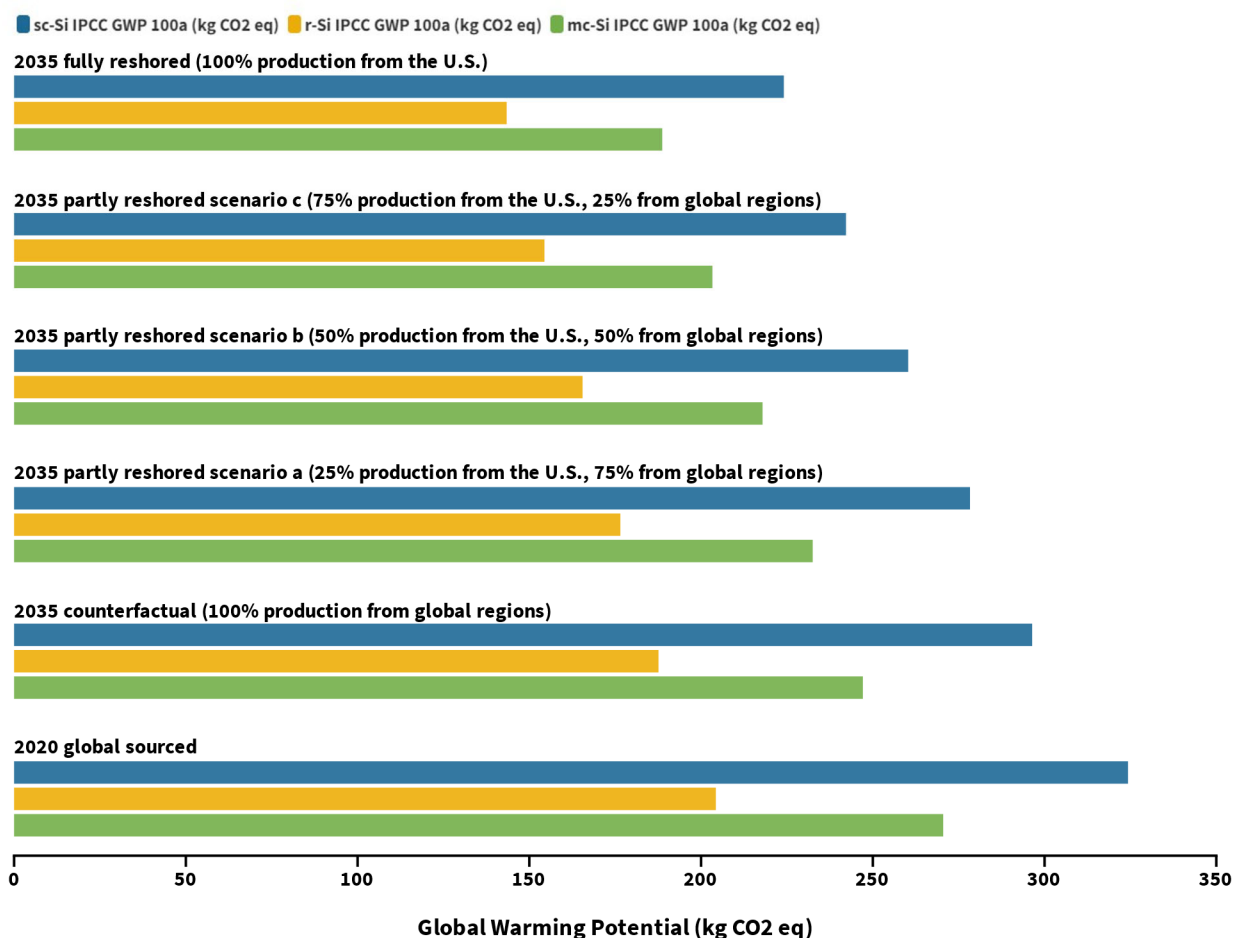

Supplementary Fig. 7 Climate change impacts of partially reshored scenarios in comparison with fully reshored and global sourced scenarios in 2035. It is also likely that instead of achieving fully reshored PV panel manufacturing in the U.S., there might be a greater share of U.S. production that is less than 100%. Here, we formulate three example scenarios of which the U.S. partially reshores PV panel manufacturing (2035 partially reshored scenario a relies on 25% domestic production, 2035 partially reshored scenario b relies on 50% domestic production, and 2035 partially reshored scenario c relies on 75% domestic production). The rest of the PV panels come from global supplies. Partially reshored scenarios result in overall lower carbon emissions than global sourced scenario but higher carbon emissions than fully reshored scenario in 2035.

### Supplementary Methods 1: Life cycle inventory and life cycle stages

In this work, we aim to evaluate the “cradle-to-site” climate change and energy impacts of reshored c-Si PV panel manufacturing to assess if the act of bringing manufacturing back home aligns with the climate target. The system boundary of the life cycle of c-Si PVs consists of several stages, from raw material acquisition to solar module production, as shown in Supplementary Fig. 8. We include all major and minor manufacturing and construction materials, from wet wood chips in quartz mining to low-iron solar

glass in module production, in the inventory (Supplementary Fig. 9). To enable a fair comparison of modules in different cases and scenarios regarding material inputs, energy consumption, and emissions, we define the system boundary to be from silica sand mining to panel manufacturing to shipping panels to the U.S. for all for consistency. In this study, the overarching functional unit, typically defined in terms of a unit quantity of product, is set to be 1 m<sup>2</sup> of the solar module according to the previous literature<sup>4,5</sup>, which is helpful to capture the changes in energy and environmental profiles proportional to PV size directly over time. We note that the end-of-life phase is excluded from the system boundary following assumptions in existing literature accounting for a lack of data<sup>6</sup>, as there has been insufficient data on the disposal phase as well as the balance of plants<sup>7</sup>.

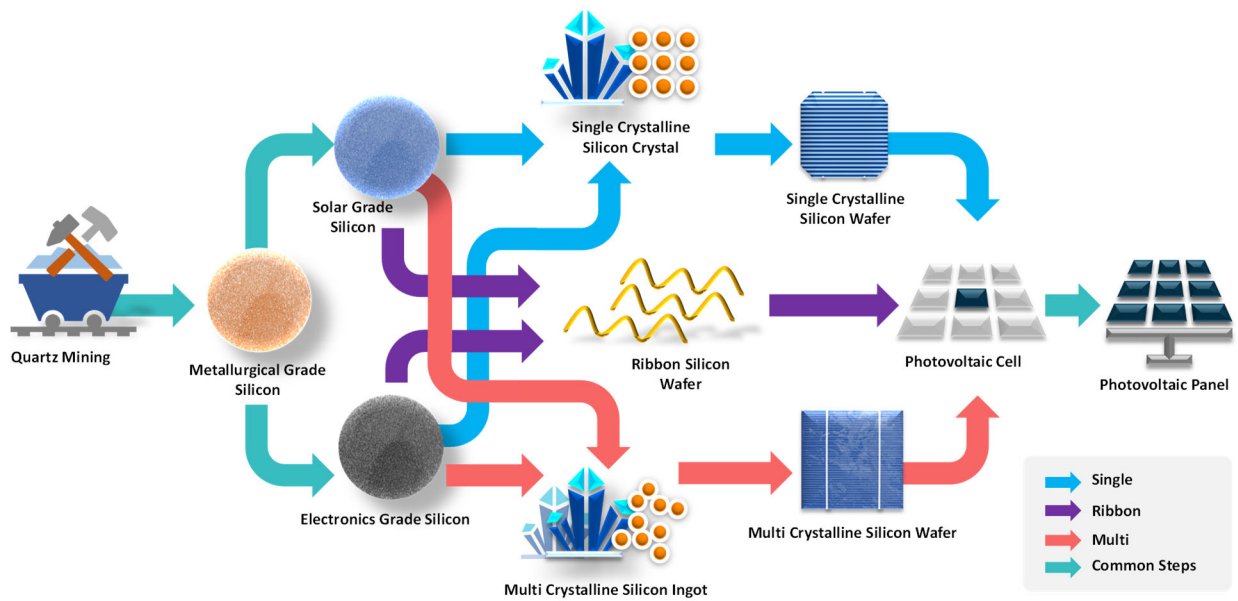

Supplementary Fig. 8 The flow diagram of manufacturing PV modules based on three types of technologies (sc-Si, r-Si, mc-Si). Flows of each type of technology are color-coded. The production of three types of silicon materials all requires the use of solar grade silicon and electronics grade silicon.

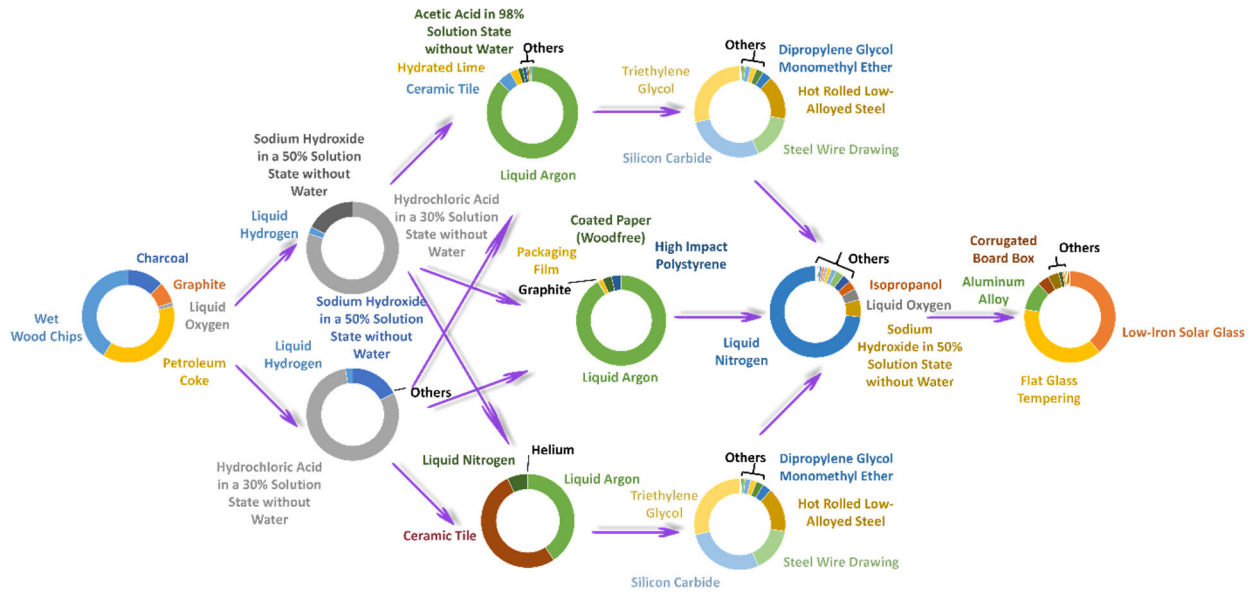

Supplementary Fig. 9 Major LCI beside from silicon materials involved in manufacturing stages from raw material mining to c-Si module manufacturing.

Table S1 presents the energy and material inventory needed under various manufacturing stages to produce one squared meter of the c-Si PV panel. In order to generate one functional unit of PV panel, the amount of energy and material inventory input and output at the panel manufacturing stage are the same regardless of the c-Si PV technology. At the cell manufacturing stage, the inventory input and output are also similar regardless of c-Si PV type, except that the amount of wafer needed to generate the same size of a cell is different for r-Si PV compared to sc-Si PV and mc-Si PV. At the wafer manufacturing stage, r-Si PV technology utilizes solar and electronics grade silicon directly to manufacture wafers. On the other hand, sc-Si PV and mc-Si PV technologies need to undergo crystal formation or ingot formation stage before proceeding to the wafer manufacturing stage.

**Table S1. Material and energy inventory of 1 m<sup>2</sup> of the three types of c-Si PV panel.**

| sc-Si                     |                                                             |           |      | r-Si                      |                                                             |           |      | mc-Si                     |                                                             |           |      |
|---------------------------|-------------------------------------------------------------|-----------|------|---------------------------|-------------------------------------------------------------|-----------|------|---------------------------|-------------------------------------------------------------|-----------|------|
| Process                   | Flow                                                        | Amount    | Unit | Process                   | Flow                                                        | Amount    | Unit | Process                   | Flow                                                        | Amount    | Unit |
| Panel manufacturing input | 1-propanol                                                  | 0.0081386 | kg   | Panel manufacturing input | 1-propanol                                                  | 0.0081386 | kg   | Panel manufacturing input | 1-propanol                                                  | 0.0081386 | kg   |
|                           | acetone, liquid                                             | 0.012959  | kg   |                           | acetone, liquid                                             | 0.012959  | kg   |                           | acetone, liquid                                             | 0.012959  | kg   |
|                           | aluminum alloy, AlMg3                                       | 2.6294    | kg   |                           | aluminum alloy, AlMg3                                       | 2.6294    | kg   |                           | aluminum alloy, AlMg3                                       | 2.6294    | kg   |
|                           | brazing solder, cadmium free                                | 0.0087647 | kg   |                           | brazing solder, cadmium free                                | 0.0087647 | kg   |                           | brazing solder, cadmium free                                | 0.0087647 | kg   |
|                           | copper, cathode                                             | 0.11269   | kg   |                           | copper, cathode                                             | 0.11269   | kg   |                           | copper, cathode                                             | 0.11269   | kg   |
|                           | corrugated board box                                        | 1.0956    | kg   |                           | corrugated board box                                        | 1.0956    | kg   |                           | corrugated board box                                        | 1.0956    | kg   |
|                           | electricity, medium voltage                                 | 4.7107    | kWh  |                           | electricity, medium voltage                                 | 4.7107    | kWh  |                           | electricity, medium voltage                                 | 4.7107    | kWh  |
|                           | ethylvinylacetate, foil                                     | 1.0017    | kg   |                           | ethylvinylacetate, foil                                     | 1.0017    | kg   |                           | ethylvinylacetate, foil                                     | 1.0017    | kg   |
|                           | glass fiber reinforced plastic, polyamide, injection molded | 0.18781   | kg   |                           | glass fiber reinforced plastic, polyamide, injection molded | 0.18781   | kg   |                           | glass fiber reinforced plastic, polyamide, injection molded | 0.18781   | kg   |
|                           | heat, district or industrial, natural gas                   | 4.86639   | MJ   |                           | heat, district or industrial, natural gas                   | 4.86639   | MJ   |                           | heat, district or industrial, natural gas                   | 4.86639   | MJ   |
|                           | lubricating oil                                             | 0.0016069 | kg   |                           | lubricating oil                                             | 0.0016069 | kg   |                           | lubricating oil                                             | 0.0016069 | kg   |

|                    |                                                                         |           |          |                    |                                                                |           |          |                    |                                                                |           |          |
|--------------------|-------------------------------------------------------------------------|-----------|----------|--------------------|----------------------------------------------------------------|-----------|----------|--------------------|----------------------------------------------------------------|-----------|----------|
| output             | methanol                                                                | 0.0021556 | Kg       | output             | methanol                                                       | 0.0021556 | kg       | output             | methanol                                                       | 0.0021556 | kg       |
|                    | nickel, class 1                                                         | 1.63E-04  | Kg       |                    | nickel, class 1                                                | 1.63E-04  | kg       |                    | nickel, class 1                                                | 1.63E-04  | kg       |
|                    | photovoltaic cell, single-Si wafer                                      | 0.93241   | m2       |                    | photovoltaic cell, ribbon-Si                                   | 0.93241   | m2       |                    | photovoltaic cell, multi-Si wafer                              | 0.93241   | m2       |
|                    | photovoltaic panel factory                                              | 4.00E-06  | Item (s) |                    | photovoltaic panel factory                                     | 4.00E-06  | Item (s) |                    | photovoltaic panel factory                                     | 4.00E-06  | Item (s) |
|                    | polyethylene terephthalate, granulate, amorphous                        | 0.37297   | kg       |                    | polyethylene terephthalate, granulate, amorphous               | 0.37297   | kg       |                    | polyethylene terephthalate, granulate, amorphous               | 0.37297   | kg       |
|                    | polyvinyl fluoride, film                                                | 0.1104    | kg       |                    | polyvinyl fluoride, film                                       | 0.1104    | kg       |                    | polyvinyl fluoride, film                                       | 0.1104    | kg       |
|                    | silicone product                                                        | 0.12195   | kg       |                    | silicone product                                               | 0.12195   | kg       |                    | silicone product                                               | 0.12195   | kg       |
|                    | solar glass, low iron                                                   | 10.079    | kg       |                    | solar glass, low iron                                          | 10.079    | kg       |                    | solar glass, low iron                                          | 10.079    | kg       |
|                    | tap water                                                               | 21.286    | kg       |                    | tap water                                                      | 21.286    | kg       |                    | tap water                                                      | 21.286    | kg       |
|                    | tempering, flat glass                                                   | 10.079    | kg       |                    | tempering, flat glass                                          | 10.079    | kg       |                    | tempering, flat glass                                          | 10.079    | kg       |
|                    | vinyl acetate                                                           | 0.0016434 | kg       |                    | vinyl acetate                                                  | 0.0016434 | kg       |                    | vinyl acetate                                                  | 0.0016434 | kg       |
|                    | wire drawing, copper                                                    | 0.11269   | kg       |                    | wire drawing, copper                                           | 0.11269   | kg       |                    | wire drawing, copper                                           | 0.11269   | kg       |
|                    | municipal solid waste                                                   | 0.03      | kg       |                    | municipal solid waste                                          | 0.03      | kg       |                    | municipal solid waste                                          | 0.03      | kg       |
|                    | photovoltaic panel, single-Si wafer                                     | 1         | m2       |                    | photovoltaic panel, ribbon-Si                                  | 1         | m2       |                    | photovoltaic panel, multi-Si wafer                             | 1         | m2       |
|                    | waste mineral oil                                                       | 1.61E-03  | kg       |                    | waste mineral oil                                              | 1.61E-03  | kg       |                    | waste mineral oil                                              | 1.61E-03  | kg       |
|                    | waste plastic, mixture                                                  | 1.6861    | kg       |                    | waste plastic, mixture                                         | 1.6861    | kg       |                    | waste plastic, mixture                                         | 1.6861    | kg       |
| Cell manufacturing | waste polyvinyl fluoride                                                | 0.1104    | kg       | Cell manufacturing | waste polyvinyl fluoride                                       | 0.1104    | kg       | Cell manufacturing | waste polyvinyl fluoride                                       | 0.1104    | kg       |
|                    | wastewater, from residence                                              | 0.021286  | m3       |                    | wastewater, from residence                                     | 0.021286  | m3       |                    | wastewater, from residence                                     | 0.021286  | m3       |
|                    | Water                                                                   | 0.0031929 | m3       |                    | Water                                                          | 0.0031929 | m3       |                    | Water                                                          | 0.0031929 | m3       |
|                    | acetic acid, without water, in 98% solution state                       | 0.0026    | kg       |                    | acetic acid, without water, in 98% solution state              | 0.0026    | kg       |                    | acetic acid, without water, in 98% solution state              | 0.0026    | kg       |
|                    | ammonia, anhydrous, liquid                                              | 0.0063    | kg       |                    | ammonia, anhydrous, liquid                                     | 0.0063    | kg       |                    | ammonia, anhydrous, liquid                                     | 0.0063    | kg       |
|                    | argon, liquid                                                           | 0.0239    | kg       |                    | argon, liquid                                                  | 0.0239    | kg       |                    | argon, liquid                                                  | 0.0239    | kg       |
|                    | calcium chloride                                                        | 0.0201    | kg       |                    | calcium chloride                                               | 0.0201    | kg       |                    | calcium chloride                                               | 0.0201    | kg       |
|                    | electricity, medium voltage                                             | 28.1989   | kWh      |                    | electricity, medium voltage                                    | 28.1989   | kWh      |                    | electricity, medium voltage                                    | 28.1989   | kWh      |
|                    | ethanol, without water, in 99.7% solution state, from ethylene          | 0.0006    | kg       |                    | ethanol, without water, in 99.7% solution state, from ethylene | 0.0006    | kg       |                    | ethanol, without water, in 99.7% solution state, from ethylene | 0.0006    | kg       |
|                    | heat, district or industrial, natural gas                               | 4         | MJ       |                    | heat, district or industrial, natural gas                      | 4         | MJ       |                    | heat, district or industrial, natural gas                      | 4         | MJ       |
|                    | heat, district or industrial, other than natural gas                    | 1.0311    | MJ       |                    | heat, district or industrial, other than natural gas           | 1.0311    | MJ       |                    | heat, district or industrial, other than natural gas           | 1.0311    | MJ       |
|                    | hydrochloric acid, without water, in 30% solution state                 | 0.0425    | kg       |                    | hydrochloric acid, without water, in 30% solution state        | 0.0425    | kg       |                    | hydrochloric acid, without water, in 30% solution state        | 0.0425    | kg       |
|                    | hydrogen fluoride                                                       | 0.0352    | kg       |                    | hydrogen fluoride                                              | 0.0352    | kg       |                    | hydrogen fluoride                                              | 0.0352    | kg       |
|                    | isopropanol                                                             | 0.0736    | kg       |                    | isopropanol                                                    | 0.0736    | kg       |                    | isopropanol                                                    | 0.0736    | kg       |
|                    | metallization paste, back side                                          | 0.0046    | kg       |                    | metallization paste, back side                                 | 0.0046    | kg       |                    | metallization paste, back side                                 | 0.0046    | kg       |
| input              | metallization paste, back side, aluminum                                | 0.067     | kg       | input              | metallization paste, back side, aluminum                       | 0.067     | kg       | input              | metallization paste, back side, aluminum                       | 0.067     | kg       |
|                    | metallization paste, front side                                         | 0.0069    | kg       |                    | metallization paste, front side                                | 0.0069    | kg       |                    | metallization paste, front side                                | 0.0069    | kg       |
|                    | nitric acid, without water, in 50% solution state                       | 0.0249    | kg       |                    | multi-Si wafer, ribbon                                         | 1.0026    | m2       |                    | multi-Si wafer                                                 | 0.9884    | m2       |
|                    | nitrogen, liquid                                                        | 1.7279    | kg       |                    | nitric acid, without water, in 50% solution state              | 0.0249    | kg       |                    | nitric acid, without water, in 50% solution state              | 0.0249    | kg       |
|                    | oxygen, liquid                                                          | 0.095     | kg       |                    | nitrogen, liquid                                               | 1.7279    | kg       |                    | nitrogen, liquid                                               | 1.7279    | kg       |
|                    | phosphoric acid, fertilizer grade, without water, in 70% solution state | 0.0072    | kg       |                    | oxygen, liquid                                                 | 0.095     | kg       |                    | oxygen, liquid                                                 | 0.095     | kg       |
|                    | phosphoryl chloride                                                     | 0.0015    | kg       |                    | phosphoric acid, fertilizer grade, without                     | 0.0072    | kg       |                    | phosphoric acid, fertilizer grade, without                     | 0.0072    | kg       |

|                           |                                                                   |          |          |                           |                                                                   |          |          |                           |                                                                   |          |          |
|---------------------------|-------------------------------------------------------------------|----------|----------|---------------------------|-------------------------------------------------------------------|----------|----------|---------------------------|-------------------------------------------------------------------|----------|----------|
| output                    | photovoltaic cell factory                                         | 0        | Item (s) | output                    | phosphoryl chloride                                               | 0.0015   | kg       | output                    | phosphoryl chloride                                               | 0.0015   | kg       |
|                           | polystyrene, expandable                                           | 0.0004   | kg       |                           | photovoltaic cell factory                                         | 0        | Item (s) |                           | photovoltaic cell factory                                         | 0        | Item (s) |
|                           | silicone product                                                  | 0.0011   | kg       |                           | polystyrene, expandable                                           | 0.0004   | kg       |                           | polystyrene, expandable                                           | 0.0004   | kg       |
|                           | single-Si wafer, photovoltaic                                     | 0.9884   | m2       |                           | silicone product                                                  | 0.0011   | kg       |                           | silicone product                                                  | 0.0011   | kg       |
|                           | sodium hydroxide, without water, in 50% solution state            | 0.1464   | kg       |                           | sodium hydroxide, without water, in 50% solution state            | 0.1464   | kg       |                           | sodium hydroxide, without water, in 50% solution state            | 0.1464   | kg       |
|                           | sodium silicate, spray powder, 80%                                | 0.0697   | kg       |                           | sodium silicate, spray powder, 80%                                | 0.0697   | kg       |                           | sodium silicate, spray powder, 80%                                | 0.0697   | kg       |
|                           | solvent, organic                                                  | 0.0013   | kg       |                           | solvent, organic                                                  | 0.0013   | kg       |                           | solvent, organic                                                  | 0.0013   | kg       |
|                           | tetrafluoroethylene                                               | 0.0029   | kg       |                           | tetrafluoroethylene                                               | 0.0029   | kg       |                           | tetrafluoroethylene                                               | 0.0029   | kg       |
|                           | titanium dioxide                                                  | 0        | kg       |                           | titanium dioxide                                                  | 0        | kg       |                           | titanium dioxide                                                  | 0        | kg       |
|                           | water, completely softened                                        | 127.9733 | kg       |                           | water, completely softened                                        | 127.9733 | kg       |                           | water, completely softened                                        | 127.9733 | kg       |
|                           | Water, cooling, unspecified natural origin                        | 0.931    | m3       |                           | Water, cooling, unspecified natural origin                        | 0.931    | m3       |                           | Water, cooling, unspecified natural origin                        | 0.931    | m3       |
|                           | Aluminum                                                          | 0.0007   | kg       |                           | Aluminum                                                          | 0.0007   | kg       |                           | Aluminum                                                          | 0.0007   | kg       |
|                           | Ethane, hexafluoro-, HFC-116                                      | 0.0001   | kg       |                           | Ethane, hexafluoro-, HFC-116                                      | 0.0001   | kg       |                           | Ethane, hexafluoro-, HFC-116                                      | 0.0001   | kg       |
|                           | Hydrogen chloride                                                 | 0.0002   | kg       |                           | Hydrogen chloride                                                 | 0.0002   | kg       |                           | Hydrogen chloride                                                 | 0.0002   | kg       |
|                           | Hydrogen fluoride                                                 | 0        | kg       |                           | Hydrogen fluoride                                                 | 0        | kg       |                           | Hydrogen fluoride                                                 | 0        | kg       |
|                           | Lead                                                              | 0.0007   | kg       |                           | Lead                                                              | 0.0007   | kg       |                           | Lead                                                              | 0.0007   | kg       |
|                           | Methane, tetrafluoro-, R-14                                       | 0.0002   | kg       |                           | Methane, tetrafluoro-, R-14                                       | 0.0002   | kg       |                           | Methane, tetrafluoro-, R-14                                       | 0.0002   | kg       |
|                           | Nitrogen oxides                                                   | 0        | kg       |                           | Nitrogen oxides                                                   | 0        | kg       |                           | Nitrogen oxides                                                   | 0        | kg       |
|                           | NMVOC, non-methane volatile organic compounds, unspecified origin | 0.1805   | kg       |                           | NMVOC, non-methane volatile organic compounds, unspecified origin | 0.1805   | kg       |                           | NMVOC, non-methane volatile organic compounds, unspecified origin | 0.1805   | kg       |
|                           | Particulates, < 2.5 um                                            | 0.0025   | kg       |                           | Particulates, < 2.5 um                                            | 0.0025   | kg       |                           | Particulates, < 2.5 um                                            | 0.0025   | kg       |
| wafer manufacturing input | photovoltaic cell, single-Si wafer                                | 0.9324   | m2       | wafer manufacturing input | photovoltaic cell, ribbon-Si                                      | 0.9324   | m2       | wafer manufacturing input | photovoltaic cell, multi-Si wafer                                 | 0.9324   | m2       |
|                           | Silicon                                                           | 0.0001   | kg       |                           | Silicon                                                           | 0.0001   | kg       |                           | Silicon                                                           | 0.0001   | kg       |
|                           | Silver                                                            | 0.0007   | kg       |                           | Silver                                                            | 0.0007   | kg       |                           | Silver                                                            | 0.0007   | kg       |
|                           | Sodium                                                            | 0        | kg       |                           | Sodium                                                            | 0        | kg       |                           | Sodium                                                            | 0        | kg       |
|                           | Tin                                                               | 0.0007   | kg       |                           | Tin                                                               | 0.0007   | kg       |                           | Tin                                                               | 0.0007   | kg       |
|                           | waste, from silicon wafer production, inorganic                   | 0.2571   | kg       |                           | waste, from silicon wafer production, inorganic                   | 0.2571   | kg       |                           | waste, from silicon wafer production, inorganic                   | 0.2571   | kg       |
|                           | wastewater from PV cell production                                | 0.2026   | m3       |                           | wastewater from PV cell production                                | 0.2026   | m3       |                           | wastewater from PV cell production                                | 0.2026   | m3       |
|                           | Water                                                             | 0.8564   | m3       |                           | Water                                                             | 0.8564   | m3       |                           | Water                                                             | 0.8564   | m3       |
|                           | wafer factory                                                     | 0        | Item (s) |                           | argon, liquid                                                     | 5.2237   | kg       |                           | wafer factory                                                     | 0        | Item (s) |
|                           | acrylic binder, without water, in 34% solution state              | 0.002    | kg       |                           | electricity, medium voltage                                       | 42.4108  | kWh      |                           | acetic acid, without water, in 98% solution state                 | 0.0385   | kg       |
|                           | hydrochloric acid, without water, in 30% solution state           | 0.0027   | kg       |                           | graphite                                                          | 0.0066   | kg       |                           | acrylic binder, without water, in 34% solution state              | 0.002    | kg       |
|                           | tap water                                                         | 0.0059   | kg       |                           | packaging film, low density polyethylene                          | 0.1003   | kg       |                           | alkylbenzene sulfonate, linear, petrochemical                     | 0.2372   | kg       |
|                           | brass                                                             | 0.0074   | kg       |                           | paper, woodfree, coated                                           | 0.1905   | kg       |                           | brass                                                             | 0.0074   | kg       |
|                           | glass wool mat                                                    | 0.0099   | kg       |                           | polystyrene, high impact                                          | 0.2005   | kg       |                           | dipropylene glycol monomethyl ether                               | 0.2965   | kg       |
|                           | sodium hydroxide, without water, in 50% solution state            | 0.0148   | kg       |                           | silicon, electronics grade                                        | 0.108    | kg       |                           | glass wool mat                                                    | 0.0099   | kg       |
|                           | acetic acid, without water, in 98% solution state                 | 0.0385   | kg       |                           | silicon, solar grade                                              | 0.634    | kg       |                           | hydrochloric acid, without water, in 30% solution state           | 0.0027   | kg       |
|                           | packaging film, low density polyethylene                          | 0.0988   | kg       |                           | AOX, Adsorbable Organic Halogen as Cl                             | 0.0005   | kg       |                           | packaging film, low density polyethylene                          | 0.0988   | kg       |



|                          |                                                             |         |          |                                      |                        |        |                                                        |        |          |
|--------------------------|-------------------------------------------------------------|---------|----------|--------------------------------------|------------------------|--------|--------------------------------------------------------|--------|----------|
| output                   | paper, woodfree, coated                                     | 0.1878  | kg       | BOD5, Biological Oxygen Demand       | 0.0296                 | kg     | paper, woodfree, coated                                | 0.1878 | kg       |
|                          | polystyrene, high impact                                    | 0.1977  | kg       | COD, Chemical Oxygen Demand          | 0.0296                 | kg     | polystyrene, high impact                               | 0.1977 | kg       |
|                          | alkylbenzene sulfonate, linear, petrochemical               | 0.2372  | kg       | Copper, ion                          | 0.0001                 | kg     | silicon carbide                                        | 2.5994 | kg       |
|                          | dipropylene glycol monomethyl ether                         | 0.2965  | kg       | DOC, Dissolved Organic Carbon        | 0.0111                 | kg     | silicon, multi-Si, casted                              | 1.1269 | kg       |
|                          | silicon, single crystal, Czochralski process, photovoltaics | 1.0623  | kg       | multi-Si wafer, ribbon               | 1.0026                 | m2     | sodium hydroxide, without water, in 50% solution state | 0.0148 | kg       |
|                          | steel, low-alloyed, hot rolled                              | 1.4653  | kg       | Nickel, ion                          | 0.0001                 | kg     | steel, low-alloyed, hot rolled                         | 1.4653 | kg       |
|                          | wire drawing, steel                                         | 1.4726  | kg       | Nitrogen                             | 0.01                   | kg     | tap water                                              | 0.0059 | kg       |
|                          | silicon carbide                                             | 2.5994  | kg       | Phosphate                            | 0.0005                 | kg     | triethylene glycol                                     | 2.6784 | kg       |
|                          | triethylene glycol                                          | 2.6784  | kg       | TOC, Total Organic Carbon            | 0.0111                 | kg     | water, completely softened                             | 64.243 | kg       |
|                          | water, completely softened                                  | 64.243  | kg       | waste, from silicon wafer production | 0.007                  | kg     | wire drawing, steel                                    | 1.4726 | kg       |
|                          | electricity, medium voltage                                 | 7.9068  | kWh      |                                      |                        |        | electricity, medium voltage                            | 7.9068 | kWh      |
|                          | heat, district or industrial, natural gas                   | 3.5581  | MJ       |                                      |                        |        | heat, district or industrial, natural gas              | 3.5581 | MJ       |
|                          | AOX, Adsorbable Organic Halogen as Cl                       | 0.0005  | kg       |                                      |                        |        | AOX, Adsorbable Organic Halogen as Cl                  | 0.0005 | kg       |
|                          | BOD5, Biological Oxygen Demand                              | 0.0292  | kg       |                                      |                        |        | BOD5, Biological Oxygen Demand                         | 0.0292 | kg       |
|                          | COD, Chemical Oxygen Demand                                 | 0.0292  | kg       |                                      |                        |        | COD, Chemical Oxygen Demand                            | 0.0292 | kg       |
|                          | Copper, ion                                                 | 0.0001  | kg       |                                      |                        |        | Copper, ion                                            | 0.0001 | kg       |
|                          | DOC, Dissolved Organic Carbon                               | 0.011   | kg       |                                      |                        |        | DOC, Dissolved Organic Carbon                          | 0.011  | kg       |
|                          | Nickel, ion                                                 | 0.0001  | kg       |                                      |                        |        | multi-Si wafer                                         | 0.9884 | m2       |
|                          | Nitrogen                                                    | 0.0098  | kg       |                                      |                        |        | Nickel, ion                                            | 0.0001 | kg       |
|                          | Phosphate                                                   | 0.0005  | kg       |                                      |                        |        | Nitrogen                                               | 0.0098 | kg       |
|                          | single-Si wafer, photovoltaic                               | 0.9884  | m2       |                                      |                        |        | Phosphate                                              | 0.0005 | kg       |
|                          | TOC, Total Organic Carbon                                   | 0.011   | kg       |                                      |                        |        | TOC, Total Organic Carbon                              | 0.011  | kg       |
|                          | waste, from silicon wafer production                        | 0.1087  | kg       |                                      |                        |        | waste, from silicon wafer production                   | 0.168  | kg       |
|                          | Water                                                       | 0.0642  | m3       |                                      |                        |        | Water                                                  | 0.0642 | m3       |
| sc-Si crystal production |                                                             |         |          |                                      | mc-Si ingot production |        |                                                        |        |          |
| input                    | acetic acid, without water, in 98% solution state           | 0.1147  | kg       |                                      |                        |        | argon, liquid                                          | 0.3004 | kg       |
|                          | acetone, liquid                                             | 0.0521  | kg       |                                      |                        |        | ceramic tile                                           | 0.3855 | kg       |
|                          | argon, liquid                                               | 6.1553  | kg       |                                      |                        |        | electricity, medium voltage                            | 21.744 | kWh      |
|                          | ceramic tile                                                | 0.3574  | kg       |                                      |                        |        | helium                                                 | 0.0001 | kg       |
|                          | electricity, medium voltage                                 | 90.9315 | kWh      |                                      |                        |        | nitrogen, liquid                                       | 0.0527 | kg       |
|                          | heat, district or industrial, natural gas                   | 65.2259 | MJ       |                                      |                        |        | silicon, electronics grade                             | 0.187  | kg       |
|                          | hydrogen fluoride                                           | 0.0538  | kg       |                                      |                        |        | silicon, solar grade                                   | 1.0979 | kg       |
|                          | lime, hydrated, packed                                      | 0.2029  | kg       |                                      |                        |        | silicone factory                                       | 0      | Item (s) |
|                          | nitric acid, without water, in 50% solution state           | 0.1006  | kg       |                                      |                        |        | Water, cooling, unspecified natural origin             | 5.6346 | m3       |
|                          | silicon, electronics grade                                  | 0.1654  | kg       |                                      |                        | output | silicon, multi-Si, casted                              | 1.1269 | kg       |
|                          | silicon, solar grade                                        | 0.9712  | kg       |                                      |                        |        | Water                                                  | 5.6346 | m3       |
|                          | silicone factory                                            | 0       | Item (s) |                                      |                        |        |                                                        |        |          |
|                          | sodium hydroxide, without water, in 50% solution state      | 0.0441  | kg       |                                      |                        |        |                                                        |        |          |
|                          | tap water                                                   | 99.9322 | kg       |                                      |                        |        |                                                        |        |          |
|                          | Water, cooling, unspecified natural origin                  | 2.4783  | m3       |                                      |                        |        |                                                        |        |          |
|                          |                                                             |         |          |                                      |                        |        |                                                        |        |          |
|                          |                                                             |         |          |                                      |                        |        |                                                        |        |          |
|                          |                                                             |         |          |                                      |                        |        |                                                        |        |          |
|                          |                                                             |         |          |                                      |                        |        |                                                        |        |          |
|                          |                                                             |         |          |                                      |                        |        |                                                        |        |          |
|                          |                                                             |         |          |                                      |                        |        |                                                        |        |          |
|                          |                                                             |         |          |                                      |                        |        |                                                        |        |          |
|                          |                                                             |         |          |                                      |                        |        |                                                        |        |          |
|                          |                                                             |         |          |                                      |                        |        |                                                        |        |          |
|                          |                                                             |         |          |                                      |                        |        |                                                        |        |          |

|        |                                                             |        |    |
|--------|-------------------------------------------------------------|--------|----|
| output | Water, river                                                | 2.1785 | m3 |
|        | Acetic acid                                                 | 0.0573 | kg |
|        | BOD5, Biological Oxygen Demand                              | 0.1454 | kg |
|        | COD, Chemical Oxygen Demand                                 | 0.1454 | kg |
|        | DOC, Dissolved Organic Carbon                               | 0.0423 | kg |
|        | Fluoride                                                    | 0.0025 | kg |
|        | Hydrocarbons, unspecified                                   | 0.0243 | kg |
|        | Hydroxide                                                   | 0.0079 | kg |
|        | Nitrogen                                                    | 0.0097 | kg |
|        | silicon, single crystal, Czochralski process, photovoltaics | 1.0623 | kg |
|        | TOC, Total Organic Carbon                                   | 0.0423 | kg |
|        | waste, from silicon wafer production, inorganic             | 3.8629 | kg |
|        | Water                                                       | 4.7568 | m3 |

---

## **Supplementary Methods 2: Electricity mix**

We obtain time series electricity generation by source data of each region from decades ago to recent years<sup>8</sup>. Typical electricity sources include coal, oil, natural gas, hydropower, nuclear, wind, etc. As the annual electricity generation increases for most regions over the years, the shares of sources also vary dramatically based on each region's individual productivity advancements, energy demand requests, energy policy emphasis, and carbon neutrality target. The data in 2010 and 2015 were retrieved directly, while the data used to represent the 2020 case were the closest to 2020.

The energy structure of different countries has differed drastically in the past ten years. While China's coal demand and production capacity remained high, the government pushed to reduce emissions, improve air quality, and enhance the competitiveness of wind and solar PV in the electricity network. In Malaysia, the share of natural gas in the power mix continued to decrease by roughly 10% every five years, from 67% in 2005 to 57% in 2010, and from 47% in 2015 to 37% in 2019, responding to the policy of switching to coal and hydro fuels. Japan was one of the few countries with a decrease in power generation from 2010 to 2020 based on its energy security, economic efficiency, as well as environmental sustainability principles. Vietnam relied more on hydropower than other countries, but its coal-fired capacity was on the rise until 2019. South Korea's energy sector was characterized by a predominance of fossil fuels, including coal, natural gas, and nuclear power, on par with Taiwan's. Singapore, Thailand, and Mexico relied heavily on natural gas as their primary power source. In contrast, Germany relied on a wide variety of fuels, with a significant increase in the contribution of wind power from 2010 to 2020. While most regions in the world still rely on natural gas and coal as major sources of electricity, most have set goals to diversify the energy mix soon, phasing out traditional fossil fuels and increasing the share of renewables.

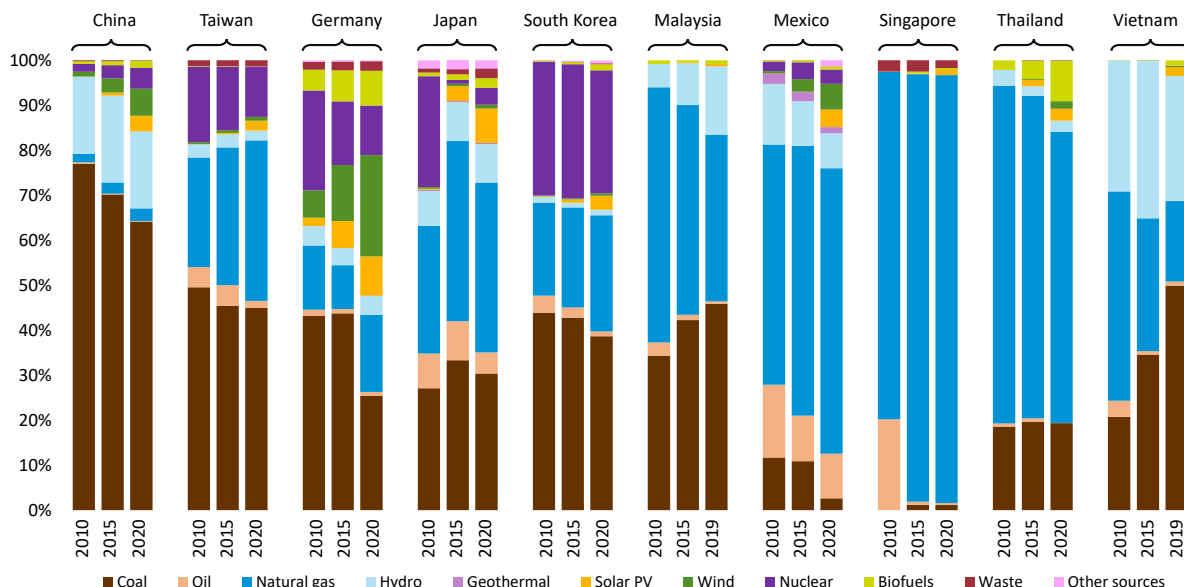

Supplementary Fig. 10 Electricity generation by energy sources among c-Si PV suppliers from 2010 to 2020. The composition of other sources differs by location. For instance, other sources in Japan represent electricity generated with procured steam, while other sources in Mexico mainly represent electricity generated from recovered waste heat from industry.

The U.S. energy policy landscape has also varied fundamentally over time in its ability to provide a renewable, affordable, and environmentally sustainable energy system to be anticipated in the future, as shown in Supplementary Fig. 11. The U.S. fuel mix for power generation has undergone a considerable shift, with coal power declining from around 20% to 13% and renewables rapidly growing from around 20% to 38%, driven by lower costs and policy support. Policies at the state and federal levels have encouraged significant investment in renewable energy generation. The fuel mix projection assumes no consideration of long-term structural changes in electricity demand accounting for the pandemic<sup>9</sup>. New capacity additions come primarily from natural gas and, increasingly, renewable technologies, as generating capacities of coal and nuclear retire. Incentives for renewables and declining technology costs support intense competition with natural gas. With the share of natural gas generating remaining relatively stable and the contribution of coal and nuclear halving, renewables will more than double their share from 2020 to 2050. Electricity demand will grow at a modest rate throughout the forecast period. The AEO projects that renewable generation will grow faster than overall electricity demand through 2050. Wind marks the main contributor to the growth in renewable generation before 2024, accounting for more than two-thirds of the growth over this period. After the production tax credit for wind energy were to be phased out at the end of 2024, solar power would account for almost three-quarters of the growth in renewable generation.

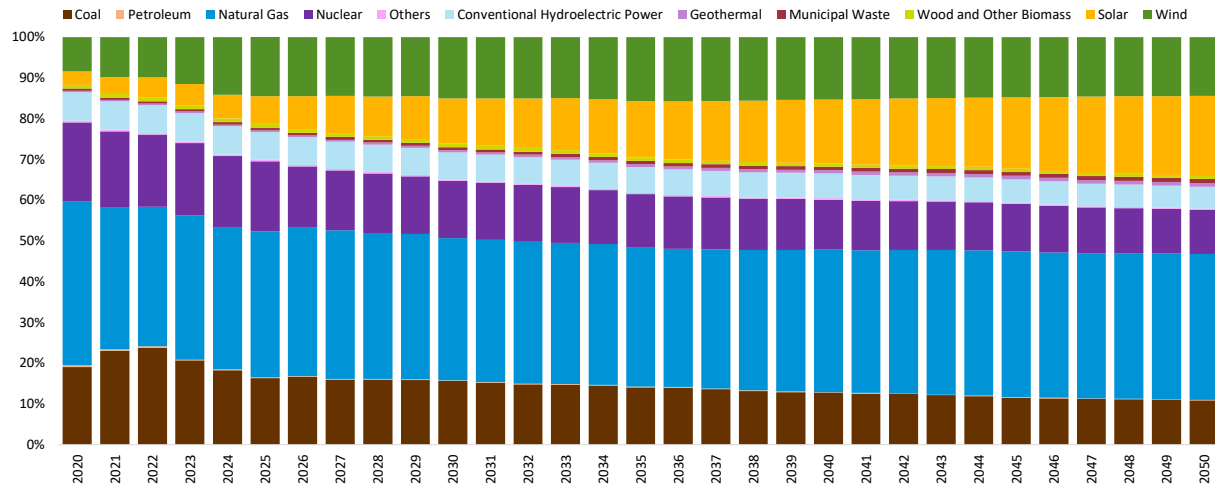

Supplementary Fig. 11 Electricity generation by energy sources data in the U.S. from 2020 to 2050. Based on projections, with the share of natural gas generating remaining relatively stable and the contribution of coal and nuclear halving, renewables is anticipated to more than double their shares from 2020 to 2050. Other sources include other renewables other than the ones listed.

#### Supplementary Results 4: life cycle impact assessment results

Table S2 presents the global warming potential (GWP) of all cases and scenarios with a detailed stage breakdown. The intergovernmental panel on climate change (IPCC) 2013 method is selected as one of the primary LCIA methods in this study, as it is imperative to comprehend the implications of promising energy suppliers: PVs. Several prevailing sustainability metrics are calculated based on GWP. GWP was illustrated over an integrated time horizon of 100 years, using the impact assessment method described by IPCC 2013 GWP 100a<sup>10,11</sup>. We first normalize the life cycle GWP on a 1 m<sup>2</sup> PV module basis, then analyze the corresponding life cycle stage breakdown.

**Table S2. Characterization factors extracted from the Ecoinvent database. The impact category is global warming potential (GWP). The GWP stage breakdown is presented.**

| Year, Manufacturing location, Process                              | IPCC GWP 100a<br>(kg CO <sub>2</sub> eq) | GWP Stage Breakdown       |                         |                |                 |       |      |       |                |
|--------------------------------------------------------------------|------------------------------------------|---------------------------|-------------------------|----------------|-----------------|-------|------|-------|----------------|
|                                                                    |                                          | Metallurgical<br>Grade Si | Electronics<br>Grade Si | Solar Grade Si | Crystals/Ingots | Wafer | Cell | Panel | Transportation |
| 2010 CN photovoltaic panel production, single-Si wafer             | 395.8                                    | 19.9                      | 20.8                    | 113.2          | 109.9           | 39.1  | 38.6 | 51.4  | 3.0            |
| 2010 DE photovoltaic panel production, single-Si wafer             | 293.2                                    | 15.0                      | 14.3                    | 78.7           | 72.2            | 33.0  | 28.1 | 49.7  | 2.0            |
| 2010 JP photovoltaic panel production, single-Si wafer             | 277.0                                    | 13.8                      | 12.2                    | 67.6           | 69.8            | 35.6  | 26.1 | 49.3  | 2.6            |
| 2010 MX photovoltaic panel production, single-Si wafer             | 290.2                                    | 14.6                      | 13.1                    | 72.5           | 75.6            | 36.1  | 27.9 | 49.6  | 0.7            |
| 2010 MY photovoltaic panel production, single-Si wafer             | 353.5                                    | 17.7                      | 17.6                    | 96.1           | 95.6            | 37.8  | 34.1 | 50.7  | 3.8            |
| 2010 TW photovoltaic panel production, single-Si wafer             | 346.7                                    | 17.3                      | 17.3                    | 94.5           | 93.0            | 37.6  | 33.3 | 50.5  | 3.1            |
| 2010 Average Global photovoltaic panel production, single-Si wafer | 347.6                                    | 17.4                      | 17.3                    | 94.8           | 93.3            | 37.5  | 33.5 | 50.6  | 3.1            |
| 2015 CN photovoltaic panel production, single-Si wafer             | 374.2                                    | 18.8                      | 19.2                    | 104.8          | 102.6           | 38.4  | 36.3 | 51.0  | 3.0            |
| 2015 JP photovoltaic panel production, single-Si wafer             | 316.7                                    | 15.8                      | 15.1                    | 83.2           | 83.0            | 36.7  | 30.2 | 50.0  | 2.6            |
| 2015 KR photovoltaic panel production, single-Si wafer             | 307.3                                    | 15.3                      | 14.4                    | 79.2           | 80.1            | 36.5  | 29.3 | 49.9  | 2.7            |
| 2015 MX photovoltaic panel production, single-Si wafer             | 280.6                                    | 14.1                      | 12.4                    | 68.7           | 72.3            | 35.8  | 26.9 | 49.5  | 0.7            |
| 2015 MY photovoltaic panel production, single-Si wafer             | 358.5                                    | 18.0                      | 17.9                    | 98.1           | 97.3            | 38.0  | 34.7 | 50.8  | 3.8            |
| 2015 TW photovoltaic panel production, single-Si wafer             | 341.8                                    | 17.1                      | 16.9                    | 92.6           | 91.4            | 37.5  | 32.8 | 50.5  | 3.1            |
| 2015 Average Global photovoltaic panel production, single-Si wafer | 352.5                                    | 17.7                      | 17.6                    | 96.2           | 95.3            | 37.8  | 34.1 | 50.7  | 3.1            |
| 2020 CN photovoltaic panel production, single-Si wafer             | 355.1                                    | 17.8                      | 17.8                    | 97.3           | 96.3            | 37.9  | 34.4 | 50.7  | 3.0            |
| 2020 KR photovoltaic panel production, single-Si wafer             | 298.4                                    | 14.9                      | 13.7                    | 75.7           | 77.1            | 36.2  | 28.4 | 49.7  | 2.7            |
| 2020 MY photovoltaic panel production, single-Si wafer             | 353.9                                    | 17.7                      | 17.6                    | 96.3           | 95.8            | 37.9  | 34.2 | 50.7  | 3.8            |
| 2020 SG photovoltaic panel production, single-Si wafer             | 255.2                                    | 12.6                      | 10.5                    | 58.6           | 62.1            | 34.9  | 23.7 | 48.9  | 3.8            |

|                                                                    |       |      |      |      |      |      |      |      |     |
|--------------------------------------------------------------------|-------|------|------|------|------|------|------|------|-----|
| 2020 TH photovoltaic panel production, single-Si wafer             | 304.7 | 15.2 | 14.0 | 77.3 | 79.3 | 36.4 | 29.1 | 49.8 | 3.5 |
| 2020 VN photovoltaic panel production, single-Si wafer             | 297.3 | 14.8 | 13.5 | 74.5 | 76.8 | 36.2 | 28.3 | 49.7 | 3.5 |
| 2020 Average Global photovoltaic panel production, single-Si wafer | 324.3 | 16.2 | 15.5 | 85.0 | 85.8 | 37.0 | 31.1 | 50.2 | 3.5 |
| 2020 US photovoltaic panel production, single-Si wafer             | 248.5 | 12.5 | 10.2 | 57.2 | 61.5 | 34.9 | 23.5 | 48.7 |     |
| 2025 US photovoltaic panel production, single-Si wafer             | 233.2 | 11.7 | 9.1  | 51.2 | 56.4 | 34.4 | 22.0 | 48.4 |     |
| 2030 US photovoltaic panel production, single-Si wafer             | 229.9 | 11.5 | 8.9  | 49.9 | 55.3 | 34.3 | 21.6 | 48.4 |     |
| 2035 US photovoltaic panel production, single-Si wafer             | 224.1 | 11.2 | 8.5  | 47.7 | 53.3 | 34.2 | 21.0 | 48.3 |     |
| 2040 US photovoltaic panel production, single-Si wafer             | 221.1 | 11.1 | 8.2  | 46.5 | 52.3 | 34.1 | 20.7 | 48.2 |     |
| 2045 US photovoltaic panel production, single-Si wafer             | 218.1 | 10.9 | 8.0  | 45.3 | 51.3 | 34.0 | 20.4 | 48.2 |     |
| 2050 US photovoltaic panel production, single-Si wafer             | 216.1 | 10.8 | 7.9  | 44.6 | 50.6 | 33.9 | 20.2 | 48.1 |     |
| 2010 CN photovoltaic panel production, ribbon-Si                   | 248.1 | 13.0 | 13.6 | 73.9 |      | 56.2 | 38.6 | 51.4 | 1.5 |
| 2010 DE photovoltaic panel production, ribbon-Si                   | 185.5 | 9.8  | 9.3  | 51.4 |      | 36.1 | 28.1 | 49.7 | 1.0 |
| 2010 JP photovoltaic panel production, ribbon-Si                   | 175.4 | 9.0  | 8.0  | 44.1 |      | 37.6 | 26.1 | 49.3 | 1.3 |
| 2010 MX photovoltaic panel production, ribbon-Si                   | 183.6 | 9.6  | 8.6  | 47.3 |      | 40.3 | 27.9 | 49.6 | 0.3 |
| 2010 MY photovoltaic panel production, ribbon-Si                   | 222.1 | 11.6 | 11.5 | 62.8 |      | 49.7 | 34.2 | 50.7 | 1.9 |
| 2010 TW photovoltaic panel production, ribbon-Si                   | 218.1 | 11.3 | 11.3 | 61.7 |      | 48.4 | 33.3 | 50.5 | 1.5 |
| 2010 Average Global photovoltaic panel production, ribbon-Si       | 218.6 | 11.4 | 11.3 | 61.9 |      | 48.4 | 33.5 | 50.6 | 1.5 |
| 2015 CN photovoltaic panel production, ribbon-Si                   | 234.9 | 12.3 | 12.5 | 68.4 |      | 52.9 | 36.3 | 51.0 | 1.5 |
| 2015 JP photovoltaic panel production, ribbon-Si                   | 199.8 | 10.3 | 9.9  | 54.3 |      | 43.7 | 30.2 | 50.0 | 1.3 |
| 2015 KR photovoltaic panel production, ribbon-Si                   | 194.0 | 10.0 | 9.4  | 51.7 |      | 42.4 | 29.3 | 49.9 | 1.3 |
| 2015 MX photovoltaic panel production, ribbon-Si                   | 177.7 | 9.2  | 8.1  | 44.9 |      | 38.8 | 26.9 | 49.5 | 0.3 |
| 2015 MY photovoltaic panel production, ribbon-Si                   | 225.2 | 11.7 | 11.7 | 64.0 |      | 50.4 | 34.7 | 50.8 | 1.9 |
| 2015 TW photovoltaic panel production, ribbon-Si                   | 215.1 | 11.1 | 11.0 | 60.4 |      | 47.7 | 32.8 | 50.5 | 1.5 |
| 2015 Average Global photovoltaic panel production, ribbon-Si       | 221.6 | 11.5 | 11.5 | 62.8 |      | 49.5 | 34.1 | 50.7 | 1.5 |
| 2020 CN photovoltaic panel production, ribbon-Si                   | 223.1 | 11.6 | 11.6 | 63.5 |      | 49.9 | 34.4 | 50.7 | 1.5 |
| 2020 KR photovoltaic panel production, ribbon-Si                   | 188.5 | 9.7  | 9.0  | 49.4 |      | 41.0 | 28.4 | 49.7 | 1.3 |
| 2020 MY photovoltaic panel production, ribbon-Si                   | 222.3 | 11.6 | 11.5 | 62.8 |      | 49.7 | 34.2 | 50.7 | 1.9 |
| 2020 SG photovoltaic panel production, ribbon-Si                   | 161.9 | 8.2  | 6.9  | 38.3 |      | 34.0 | 23.7 | 48.9 | 1.9 |
| 2020 TH photovoltaic panel production, ribbon-Si                   | 192.3 | 9.9  | 9.2  | 50.5 |      | 42.1 | 29.1 | 49.8 | 1.7 |
| 2020 VN photovoltaic panel production, ribbon-Si                   | 187.7 | 9.7  | 8.8  | 48.6 |      | 40.9 | 28.3 | 49.7 | 1.7 |
| 2020 Average Global photovoltaic panel production, ribbon-Si       | 204.3 | 10.6 | 10.1 | 55.5 |      | 45.1 | 31.1 | 50.2 | 1.7 |

|                                                                   |       |      |      |       |      |      |      |      |     |
|-------------------------------------------------------------------|-------|------|------|-------|------|------|------|------|-----|
| 2020 US photovoltaic panel production, ribbon-Si                  | 158.3 | 8.1  | 6.7  | 37.3  |      | 33.7 | 23.5 | 48.9 |     |
| 2025 US photovoltaic panel production, ribbon-Si                  | 149.0 | 7.6  | 6.0  | 33.4  |      | 31.4 | 22.0 | 48.6 |     |
| 2030 US photovoltaic panel production, ribbon-Si                  | 146.9 | 7.5  | 5.8  | 32.6  |      | 30.8 | 21.6 | 48.6 |     |
| 2035 US photovoltaic panel production, ribbon-Si                  | 143.4 | 7.3  | 5.5  | 31.1  |      | 29.9 | 21.0 | 48.5 |     |
| 2040 US photovoltaic panel production, ribbon-Si                  | 141.5 | 7.2  | 5.4  | 30.4  |      | 29.4 | 20.7 | 48.4 |     |
| 2045 US photovoltaic panel production, ribbon-Si                  | 139.7 | 7.1  | 5.2  | 29.6  |      | 29.0 | 20.4 | 48.4 |     |
| 2050 US photovoltaic panel production, ribbon-Si                  | 138.4 | 7.0  | 5.1  | 29.1  |      | 28.7 | 20.2 | 48.3 |     |
| 2010 CN photovoltaic panel production, multi-Si wafer             | 328.4 | 22.5 | 23.5 | 128.0 | 22.4 | 39.1 | 38.6 | 51.4 | 3.0 |
| 2010 DE photovoltaic panel production, multi-Si wafer             | 249.6 | 17.0 | 16.1 | 89.0  | 14.6 | 33.1 | 28.1 | 49.7 | 2.0 |
| 2010 JP photovoltaic panel production, multi-Si wafer             | 232.3 | 15.5 | 13.8 | 76.4  | 12.9 | 35.6 | 26.1 | 49.3 | 2.6 |
| 2010 MX photovoltaic panel production, multi-Si wafer             | 242.0 | 16.5 | 14.8 | 81.9  | 14.3 | 36.1 | 27.9 | 49.6 | 0.7 |
| 2010 MY photovoltaic panel production, multi-Si wafer             | 294.1 | 20.0 | 19.9 | 108.7 | 19.1 | 37.9 | 34.1 | 50.7 | 3.8 |
| 2010 TW photovoltaic panel production, multi-Si wafer             | 289.0 | 19.6 | 19.5 | 106.8 | 18.4 | 37.6 | 33.3 | 50.5 | 3.1 |
| 2010 Average Global photovoltaic panel production, multi-Si wafer | 289.7 | 19.7 | 19.6 | 107.2 | 18.6 | 37.5 | 33.5 | 50.6 | 3.1 |
| 2015 CN photovoltaic panel production, multi-Si wafer             | 310.8 | 21.2 | 21.7 | 118.4 | 20.7 | 38.5 | 36.3 | 51.0 | 3.0 |
| 2015 JP photovoltaic panel production, multi-Si wafer             | 264.7 | 17.8 | 17.1 | 94.1  | 16.0 | 36.8 | 30.2 | 50.0 | 2.6 |
| 2015 KR photovoltaic panel production, multi-Si wafer             | 256.8 | 17.3 | 16.3 | 89.5  | 15.3 | 36.5 | 29.3 | 49.9 | 2.7 |
| 2015 MX photovoltaic panel production, multi-Si wafer             | 234.1 | 16.0 | 14.0 | 77.7  | 13.5 | 35.8 | 26.9 | 49.5 | 0.7 |
| 2015 MY photovoltaic panel production, multi-Si wafer             | 298.1 | 20.3 | 20.3 | 110.8 | 19.5 | 38.0 | 34.7 | 50.8 | 3.8 |
| 2015 TW photovoltaic panel production, multi-Si wafer             | 285.0 | 19.3 | 19.1 | 104.7 | 18.0 | 37.5 | 32.8 | 50.5 | 3.1 |
| 2015 Average Global photovoltaic panel production, multi-Si wafer | 293.3 | 20.0 | 19.9 | 108.8 | 19.0 | 37.8 | 34.1 | 50.7 | 3.1 |
| 2020 CN photovoltaic panel production, multi-Si wafer             | 295.3 | 20.1 | 20.1 | 110.0 | 19.2 | 37.9 | 34.4 | 50.7 | 3.0 |
| 2020 KR photovoltaic panel production, multi-Si wafer             | 249.6 | 16.8 | 15.5 | 85.6  | 14.6 | 36.2 | 28.4 | 49.7 | 2.7 |
| 2020 MY photovoltaic panel production, multi-Si wafer             | 294.4 | 20.1 | 19.9 | 108.8 | 19.1 | 37.9 | 34.2 | 50.7 | 3.8 |
| 2020 SG photovoltaic panel production, multi-Si wafer             | 214.9 | 14.2 | 11.9 | 66.3  | 11.0 | 34.9 | 23.7 | 48.9 | 3.8 |
| 2020 TH photovoltaic panel production, multi-Si wafer             | 254.5 | 17.2 | 15.9 | 87.4  | 15.2 | 36.4 | 29.1 | 49.8 | 3.5 |
| 2020 VN photovoltaic panel production, multi-Si wafer             | 248.5 | 16.8 | 15.3 | 84.2  | 14.6 | 36.2 | 28.3 | 49.7 | 3.5 |
| 2020 Average Global photovoltaic panel production, multi-Si wafer | 270.4 | 18.3 | 17.5 | 96.1  | 16.7 | 37.0 | 31.1 | 50.2 | 3.5 |
| 2020 US photovoltaic panel production, multi-Si wafer             | 208.5 | 14.1 | 11.6 | 64.6  | 10.9 | 34.9 | 23.5 | 48.9 |     |
| 2025 US photovoltaic panel production, multi-Si wafer             | 196.1 | 13.2 | 10.3 | 57.9  | 9.7  | 34.4 | 22.0 | 48.6 |     |
| 2030 US photovoltaic panel production, multi-Si wafer             | 193.5 | 13.0 | 10.0 | 56.5  | 9.4  | 34.3 | 21.6 | 48.6 |     |



|                                                       |       |      |     |      |     |      |      |      |
|-------------------------------------------------------|-------|------|-----|------|-----|------|------|------|
| 2035 US photovoltaic panel production, multi-Si wafer | 188.7 | 12.7 | 9.6 | 53.9 | 8.9 | 34.2 | 21.0 | 48.5 |
| 2040 US photovoltaic panel production, multi-Si wafer | 186.2 | 12.5 | 9.3 | 52.6 | 8.7 | 34.1 | 20.7 | 48.4 |
| 2045 US photovoltaic panel production, multi-Si wafer | 183.8 | 12.3 | 9.1 | 51.3 | 8.5 | 34.0 | 20.4 | 48.4 |
| 2050 US photovoltaic panel production, multi-Si wafer | 182.2 | 12.2 | 8.9 | 50.4 | 8.3 | 33.9 | 20.2 | 48.3 |

---

Table S3 presents the cumulative energy demand of all cases and scenarios with a detailed energy stage breakdown. Primary energy consumption is selected as another primary LCIA method in this study, as it is imperative to comprehend the energy implications of promising energy suppliers: PVs. Several prevailing sustainability metrics are calculated based on the CED.

**Table S3. Characterization factors extracted from the Ecoinvent database. The impact category is cumulative energy demand (CED). The CED stage breakdown is presented.**

| Year, Manufacturing location, Process                              | CED (MJ) | Energy Stage Breakdown |                      |                |                 |       |       |       |                |
|--------------------------------------------------------------------|----------|------------------------|----------------------|----------------|-----------------|-------|-------|-------|----------------|
|                                                                    |          | Metallurgical Grade Si | Electronics Grade Si | Solar Grade Si | Crystals/Ingots | Wafer | Cell  | Panel | Transportation |
| 2010 CN photovoltaic panel production, single-Si wafer             | 4739.3   | 224.2                  | 223.6                | 1238.9         | 1232.7          | 686.2 | 396.6 | 696.5 | 40.6           |
| 2010 DE photovoltaic panel production, single-Si wafer             | 4880.5   | 231.2                  | 243.0                | 1345.8         | 1282.6          | 634.0 | 410.8 | 705.4 | 27.7           |
| 2010 JP photovoltaic panel production, single-Si wafer             | 4927.6   | 233.5                  | 238.9                | 1320.6         | 1292.9          | 691.5 | 415.3 | 699.6 | 35.2           |
| 2010 MX photovoltaic panel production, single-Si wafer             | 4574.8   | 218.2                  | 212.1                | 1178.0         | 1193.5          | 682.8 | 384.4 | 694.5 | 11.2           |
| 2010 MY photovoltaic panel production, single-Si wafer             | 5063.7   | 240.6                  | 246.2                | 1359.5         | 1338.8          | 695.5 | 429.5 | 702.0 | 51.6           |
| 2010 TW photovoltaic panel production, single-Si wafer             | 5092.6   | 241.3                  | 251.1                | 1385.4         | 1343.5          | 695.9 | 430.9 | 702.3 | 42.2           |
| 2010 Average Global photovoltaic panel production, single-Si wafer | 5000.2   | 237.1                  | 243.7                | 1346.3         | 1316.5          | 690.1 | 422.5 | 701.2 | 42.9           |
| 2015 CN photovoltaic panel production, single-Si wafer             | 4650.3   | 219.6                  | 217.0                | 1204.0         | 1203.0          | 683.7 | 387.4 | 695.0 | 40.6           |
| 2015 JP photovoltaic panel production, single-Si wafer             | 4606.0   | 216.9                  | 215.4                | 1195.6         | 1184.9          | 682.1 | 381.8 | 694.0 | 35.2           |
| 2015 KR photovoltaic panel production, single-Si wafer             | 5244.6   | 250.2                  | 261.3                | 1439.5         | 1401.3          | 700.9 | 448.9 | 705.3 | 37.3           |
| 2015 MX photovoltaic panel production, single-Si wafer             | 4535.9   | 216.2                  | 209.3                | 1162.9         | 1180.4          | 681.7 | 380.4 | 693.8 | 11.2           |
| 2015 MY photovoltaic panel production, single-Si wafer             | 5000.5   | 237.3                  | 241.6                | 1334.8         | 1317.7          | 693.6 | 422.9 | 700.9 | 51.6           |
| 2015 TW photovoltaic panel production, single-Si wafer             | 5010.5   | 237.1                  | 245.1                | 1353.4         | 1316.0          | 693.5 | 422.4 | 700.8 | 42.2           |
| 2015 Average Global photovoltaic panel production, single-Si wafer | 4833.3   | 228.9                  | 230.3                | 1275.0         | 1263.3          | 688.9 | 406.1 | 698.1 | 42.6           |
| 2020 CN photovoltaic panel production, single-Si wafer             | 4580.5   | 216.1                  | 211.8                | 1176.5         | 1179.9          | 681.6 | 380.2 | 693.8 | 40.6           |
| 2020 KR photovoltaic panel production, single-Si wafer             | 5127.1   | 244.1                  | 252.8                | 1394.1         | 1361.6          | 697.4 | 436.6 | 703.2 | 37.3           |
| 2020 MY photovoltaic panel production, single-Si wafer             | 4899.3   | 232.1                  | 234.2                | 1295.3         | 1283.8          | 690.7 | 412.4 | 699.2 | 51.6           |
| 2020 SG photovoltaic panel production, single-Si wafer             | 4405.7   | 205.2                  | 200.3                | 1115.0         | 1109.1          | 675.5 | 358.2 | 690.1 | 52.3           |
| 2020 TH photovoltaic panel production, single-Si wafer             | 4419.9   | 207.4                  | 199.5                | 1111.0         | 1123.7          | 676.8 | 362.8 | 690.9 | 47.8           |
| 2020 VN photovoltaic panel production, single-Si wafer             | 4238.0   | 198.3                  | 185.8                | 1038.2         | 1064.5          | 671.6 | 344.4 | 687.8 | 47.4           |
| 2020 Average Global photovoltaic panel production, single-Si wafer | 4654.7   | 219.6                  | 216.7                | 1202.3         | 1202.5          | 683.6 | 387.2 | 695.0 | 47.9           |
| 2020 US photovoltaic panel production, single-Si wafer             | 4479.2   | 212.8                  | 208.0                | 1155.9         | 1158.9          | 679.8 | 373.6 | 690.3 |                |

|                                                              |        |       |       |        |        |       |       |       |      |
|--------------------------------------------------------------|--------|-------|-------|--------|--------|-------|-------|-------|------|
| 2025 US photovoltaic panel production, single-Si wafer       | 4269.8 | 202.0 | 192.6 | 1074.4 | 1088.6 | 673.7 | 351.8 | 686.6 |      |
| 2030 US photovoltaic panel production, single-Si wafer       | 4119.6 | 194.2 | 181.7 | 1016.1 | 1038.1 | 669.3 | 336.2 | 684.0 |      |
| 2035 US photovoltaic panel production, single-Si wafer       | 4024.6 | 189.3 | 174.7 | 979.4  | 1006.1 | 666.5 | 326.2 | 682.4 |      |
| 2040 US photovoltaic panel production, single-Si wafer       | 3964.0 | 186.2 | 170.3 | 955.9  | 985.6  | 664.7 | 319.9 | 681.3 |      |
| 2045 US photovoltaic panel production, single-Si wafer       | 3911.1 | 183.4 | 166.5 | 935.4  | 967.8  | 663.2 | 314.4 | 680.4 |      |
| 2050 US photovoltaic panel production, single-Si wafer       | 3854.8 | 180.5 | 162.3 | 913.4  | 949.0  | 661.5 | 308.5 | 679.4 |      |
| 2010 CN photovoltaic panel production, ribbon-Si             | 2885.7 | 146.4 | 146.0 | 808.8  |        | 671.4 | 396.6 | 696.5 | 20.1 |
| 2010 DE photovoltaic panel production, ribbon-Si             | 3003.6 | 150.9 | 158.7 | 878.6  |        | 685.5 | 410.8 | 705.4 | 13.7 |
| 2010 JP photovoltaic panel production, ribbon-Si             | 3002.4 | 152.4 | 156.0 | 862.1  |        | 699.5 | 415.3 | 699.6 | 17.4 |
| 2010 MX photovoltaic panel production, ribbon-Si             | 2787.5 | 142.4 | 138.5 | 769.0  |        | 653.1 | 384.4 | 694.5 | 5.5  |
| 2010 MY photovoltaic panel production, ribbon-Si             | 3083.2 | 157.0 | 160.8 | 887.5  |        | 720.9 | 429.5 | 702.0 | 25.5 |
| 2010 TW photovoltaic panel production, ribbon-Si             | 3103.0 | 157.5 | 164.0 | 904.4  |        | 723.1 | 431.0 | 702.3 | 20.8 |
| 2010 Average Global photovoltaic panel production, ribbon-Si | 3047.6 | 154.8 | 159.1 | 878.9  |        | 709.9 | 422.5 | 701.2 | 21.2 |
| 2015 CN photovoltaic panel production, ribbon-Si             | 2831.1 | 143.4 | 141.7 | 786.0  |        | 657.5 | 387.4 | 695.0 | 20.1 |
| 2015 JP photovoltaic panel production, ribbon-Si             | 2805.1 | 141.6 | 140.7 | 780.5  |        | 649.1 | 381.8 | 694.0 | 17.4 |
| 2015 KR photovoltaic panel production, ribbon-Si             | 3196.3 | 163.3 | 170.6 | 939.7  |        | 750.0 | 448.9 | 705.3 | 18.4 |
| 2015 MX photovoltaic panel production, ribbon-Si             | 2763.7 | 141.1 | 136.6 | 759.2  |        | 647.0 | 380.4 | 693.8 | 5.5  |
| 2015 MY photovoltaic panel production, ribbon-Si             | 3044.4 | 154.9 | 157.7 | 871.4  |        | 711.0 | 422.9 | 700.9 | 25.5 |
| 2015 TW photovoltaic panel production, ribbon-Si             | 3052.7 | 154.8 | 160.0 | 883.5  |        | 710.3 | 422.4 | 700.8 | 20.8 |
| 2015 Average Global photovoltaic panel production, ribbon-Si | 2943.1 | 149.5 | 150.4 | 832.3  |        | 685.7 | 406.1 | 698.1 | 21.0 |
| 2020 CN photovoltaic panel production, ribbon-Si             | 2788.2 | 141.1 | 138.3 | 768.0  |        | 646.8 | 380.2 | 693.8 | 20.1 |
| 2020 KR photovoltaic panel production, ribbon-Si             | 3124.2 | 159.3 | 165.0 | 910.1  |        | 731.5 | 436.6 | 703.2 | 18.4 |
| 2020 MY photovoltaic panel production, ribbon-Si             | 2982.4 | 151.5 | 152.9 | 845.6  |        | 695.2 | 412.4 | 699.2 | 25.5 |
| 2020 SG photovoltaic panel production, ribbon-Si             | 2680.6 | 133.9 | 130.8 | 727.9  |        | 613.8 | 358.3 | 690.1 | 25.8 |
| 2020 TH photovoltaic panel production, ribbon-Si             | 2688.8 | 135.4 | 130.3 | 725.3  |        | 620.6 | 362.8 | 690.9 | 23.6 |
| 2020 VN photovoltaic panel production, ribbon-Si             | 2577.2 | 129.5 | 121.3 | 677.7  |        | 593.0 | 344.4 | 687.8 | 23.4 |
| 2020 Average Global photovoltaic panel production, ribbon-Si | 2832.9 | 143.3 | 141.5 | 784.9  |        | 657.3 | 387.2 | 695.0 | 23.7 |
| 2020 US photovoltaic panel production, ribbon-Si             | 2732.6 | 138.9 | 135.8 | 754.6  |        | 637.0 | 373.6 | 692.7 |      |
| 2025 US photovoltaic panel production, ribbon-Si             | 2604.2 | 131.9 | 125.8 | 701.4  |        | 604.2 | 351.8 | 689.1 |      |
| 2030 US photovoltaic panel production, ribbon-Si             | 2512.0 | 126.8 | 118.6 | 663.3  |        | 580.7 | 336.2 | 686.4 |      |
| 2035 US photovoltaic panel production, ribbon-Si             | 2453.8 | 123.6 | 114.1 | 639.4  |        | 565.7 | 326.2 | 684.8 |      |

|                                                                   |        |       |       |        |       |       |       |       |      |
|-------------------------------------------------------------------|--------|-------|-------|--------|-------|-------|-------|-------|------|
| 2040 US photovoltaic panel production, ribbon-Si                  | 2416.6 | 121.5 | 111.2 | 624.0  |       | 556.2 | 319.9 | 683.7 |      |
| 2045 US photovoltaic panel production, ribbon-Si                  | 2384.2 | 119.7 | 108.7 | 610.6  |       | 547.9 | 314.4 | 682.8 |      |
| 2050 US photovoltaic panel production, ribbon-Si                  | 2349.6 | 117.8 | 106.0 | 596.3  |       | 539.1 | 308.5 | 681.8 |      |
| 2010 CN photovoltaic panel production, multi-Si wafer             | 3964.0 | 253.5 | 252.7 | 1400.6 | 237.1 | 686.4 | 396.6 | 696.5 | 40.6 |
| 2010 DE photovoltaic panel production, multi-Si wafer             | 4083.4 | 261.4 | 274.8 | 1521.4 | 247.9 | 634.2 | 410.8 | 705.4 | 27.7 |
| 2010 JP photovoltaic panel production, multi-Si wafer             | 4120.4 | 264.0 | 270.1 | 1492.9 | 251.5 | 691.7 | 415.3 | 699.6 | 35.2 |
| 2010 MX photovoltaic panel production, multi-Si wafer             | 3819.1 | 246.6 | 239.8 | 1331.7 | 227.8 | 683.0 | 384.4 | 694.5 | 11.2 |
| 2010 MY photovoltaic panel production, multi-Si wafer             | 4228.5 | 272.0 | 278.4 | 1536.9 | 262.5 | 695.7 | 429.5 | 702.0 | 51.6 |
| 2010 TW photovoltaic panel production, multi-Si wafer             | 4257.9 | 272.8 | 283.9 | 1566.2 | 263.6 | 696.1 | 430.9 | 702.3 | 42.2 |
| 2010 Average Global photovoltaic panel production, multi-Si wafer | 4179.4 | 268.0 | 275.5 | 1521.9 | 257.1 | 690.3 | 422.5 | 701.2 | 42.9 |
| 2015 CN photovoltaic panel production, multi-Si wafer             | 3891.6 | 248.3 | 245.3 | 1361.1 | 230.0 | 683.9 | 387.4 | 695.0 | 40.6 |
| 2015 JP photovoltaic panel production, multi-Si wafer             | 3859.4 | 245.2 | 243.5 | 1351.6 | 225.7 | 682.3 | 381.8 | 694.0 | 35.2 |
| 2015 KR photovoltaic panel production, multi-Si wafer             | 4375.6 | 282.8 | 295.4 | 1627.4 | 277.4 | 701.1 | 448.8 | 705.3 | 37.3 |
| 2015 MX photovoltaic panel production, multi-Si wafer             | 3787.5 | 244.4 | 236.6 | 1314.6 | 224.6 | 681.9 | 380.4 | 693.8 | 11.2 |
| 2015 MY photovoltaic panel production, multi-Si wafer             | 4177.1 | 268.3 | 273.1 | 1508.9 | 257.4 | 693.8 | 422.9 | 700.9 | 51.6 |
| 2015 TW photovoltaic panel production, multi-Si wafer             | 4191.2 | 268.0 | 277.1 | 1529.9 | 257.1 | 693.7 | 422.4 | 700.8 | 42.2 |
| 2015 Average Global photovoltaic panel production, multi-Si wafer | 4040.9 | 258.8 | 260.4 | 1441.3 | 244.4 | 689.1 | 406.1 | 698.1 | 42.6 |
| 2020 CN photovoltaic panel production, multi-Si wafer             | 3834.6 | 244.3 | 239.5 | 1329.9 | 224.5 | 681.8 | 380.2 | 693.8 | 40.6 |
| 2020 KR photovoltaic panel production, multi-Si wafer             | 4280.4 | 275.9 | 285.7 | 1576.0 | 268.0 | 697.7 | 436.6 | 703.2 | 37.3 |
| 2020 MY photovoltaic panel production, multi-Si wafer             | 4094.9 | 262.4 | 264.7 | 1464.3 | 249.3 | 690.9 | 412.4 | 699.2 | 51.6 |
| 2020 SG photovoltaic panel production, multi-Si wafer             | 3702.7 | 231.9 | 226.4 | 1260.5 | 207.6 | 675.7 | 358.2 | 690.1 | 52.3 |
| 2020 TH photovoltaic panel production, multi-Si wafer             | 3705.5 | 234.5 | 225.5 | 1256.0 | 211.1 | 677.0 | 362.8 | 690.9 | 47.8 |
| 2020 VN photovoltaic panel production, multi-Si wafer             | 3556.2 | 224.2 | 210.1 | 1173.6 | 196.9 | 671.8 | 344.4 | 687.8 | 47.4 |
| 2020 Average Global photovoltaic panel production, multi-Si wafer | 3896.1 | 248.2 | 244.9 | 1359.1 | 229.9 | 683.8 | 387.2 | 695.0 | 47.9 |
| 2020 US photovoltaic panel production, multi-Si wafer             | 3748.2 | 240.6 | 235.1 | 1306.7 | 219.5 | 680.0 | 373.6 | 692.7 |      |
| 2025 US photovoltaic panel production, multi-Si wafer             | 3578.2 | 228.4 | 217.8 | 1214.6 | 202.7 | 673.9 | 351.8 | 689.1 |      |
| 2030 US photovoltaic panel production, multi-Si wafer             | 3456.3 | 219.6 | 205.4 | 1148.7 | 190.6 | 669.5 | 336.2 | 686.4 |      |
| 2035 US photovoltaic panel production, multi-Si wafer             | 3379.4 | 214.0 | 197.6 | 1107.2 | 182.9 | 666.7 | 326.2 | 684.8 |      |
| 2040 US photovoltaic panel production, multi-Si wafer             | 3330.2 | 210.4 | 192.6 | 1080.7 | 178.1 | 664.9 | 319.9 | 683.7 |      |
| 2045 US photovoltaic panel production, multi-Si wafer             | 3287.3 | 207.3 | 188.2 | 1057.5 | 173.8 | 663.4 | 314.4 | 682.8 |      |
| 2050 US photovoltaic panel production, multi-Si wafer             | 3241.6 | 204.1 | 183.5 | 1032.6 | 169.3 | 661.7 | 308.5 | 681.8 |      |

Table S4 presents the cumulative energy demand (CED) with a detailed impact analysis. Types of energy consumption include non-renewable biomass, renewable water, non-renewable nuclear, renewable biomass, and other renewables such as wind, solar, geothermal, etc. Most energy consumptions come from fossil energy, while the amount of non-renewable biomass is negligible, 1/40000 as much as the energy impact from fossil energy.

**Table S4. Characterization factors extracted from the Ecoinvent database. The impact category is cumulative energy demand (CED). The CED impact analysis is presented.**

| Year, Manufacturing location, Process                              | CED (MJ) | Energy Impact Analysis |                       |                  |                        |                    |                                             |
|--------------------------------------------------------------------|----------|------------------------|-----------------------|------------------|------------------------|--------------------|---------------------------------------------|
|                                                                    |          | Biomass(non-renewable) | Fossil(non-renewable) | Water(renewable) | Nuclear(non-renewable) | Biomass(renewable) | Others (wind, solar, geothermal)(renewable) |
| 2010 CN photovoltaic panel production, single-Si wafer             | 4739.3   | 0.1                    | 4107.0                | 260.0            | 213.8                  | 128.2              | 30.3                                        |
| 2010 DE photovoltaic panel production, single-Si wafer             | 4880.5   | 0.0                    | 3585.5                | 109.4            | 989.1                  | 96.2               | 100.1                                       |
| 2010 JP photovoltaic panel production, single-Si wafer             | 4927.6   | 0.1                    | 3533.8                | 152.4            | 1097.1                 | 116.3              | 27.9                                        |
| 2010 MX photovoltaic panel production, single-Si wafer             | 4574.8   | 0.1                    | 3966.0                | 219.9            | 234.2                  | 80.7               | 73.8                                        |
| 2010 MY photovoltaic panel production, single-Si wafer             | 5063.7   | 0.1                    | 4652.0                | 130.3            | 145.9                  | 116.9              | 18.5                                        |
| 2010 TW photovoltaic panel production, single-Si wafer             | 5092.6   | 0.1                    | 4148.9                | 92.8             | 748.1                  | 79.1               | 23.6                                        |
| 2010 Average Global photovoltaic panel production, single-Si wafer | 5000.2   | 0.1                    | 4219.1                | 135.1            | 516.4                  | 100.7              | 29.0                                        |
| 2015 CN photovoltaic panel production, single-Si wafer             | 4650.3   | 0.1                    | 3920.9                | 282.0            | 255.4                  | 139.3              | 52.6                                        |
| 2015 JP photovoltaic panel production, single-Si wafer             | 4606.0   | 0.1                    | 4063.2                | 161.7            | 214.4                  | 136.0              | 30.5                                        |
| 2015 KR photovoltaic panel production, single-Si wafer             | 5244.6   | 0.1                    | 3840.4                | 77.1             | 1212.9                 | 92.5               | 21.7                                        |
| 2015 MX photovoltaic panel production, single-Si wafer             | 4535.9   | 0.1                    | 3880.8                | 182.4            | 292.5                  | 88.2               | 91.8                                        |
| 2015 MY photovoltaic panel production, single-Si wafer             | 5000.5   | 0.1                    | 4557.4                | 172.8            | 145.8                  | 105.8              | 18.6                                        |
| 2015 TW photovoltaic panel production, single-Si wafer             | 5010.5   | 0.1                    | 4161.5                | 92.4             | 652.9                  | 78.2               | 25.4                                        |
| 2015 Average Global photovoltaic panel production, single-Si wafer | 4833.3   | 0.1                    | 4180.6                | 200.2            | 299.6                  | 116.0              | 36.8                                        |
| 2020 CN photovoltaic panel production, single-Si wafer             | 4580.5   | 0.1                    | 3756.7                | 259.3            | 319.4                  | 162.1              | 83.0                                        |
| 2020 KR photovoltaic panel production, single-Si wafer             | 5127.1   | 0.1                    | 3774.9                | 77.6             | 1128.8                 | 120.1              | 25.6                                        |
| 2020 MY photovoltaic panel production, single-Si wafer             | 4899.3   | 0.1                    | 4380.3                | 234.0            | 145.6                  | 120.7              | 18.6                                        |
| 2020 SG photovoltaic panel production, single-Si wafer             | 4405.7   | 0.1                    | 4100.5                | 70.0             | 143.8                  | 73.2               | 18.1                                        |
| 2020 TH photovoltaic panel production, single-Si wafer             | 4419.9   | 0.1                    | 4059.9                | 100.3            | 148.5                  | 74.6               | 36.6                                        |
| 2020 VN photovoltaic panel production, single-Si wafer             | 4238.0   | 0.1                    | 3602.8                | 373.4            | 143.7                  | 96.6               | 21.5                                        |
| 2020 Average Global photovoltaic panel production, single-Si wafer | 4654.7   | 0.1                    | 4044.0                | 222.5            | 252.7                  | 108.3              | 27.2                                        |

|                                                              |        |     |        |       |       |       |       |
|--------------------------------------------------------------|--------|-----|--------|-------|-------|-------|-------|
| 2020 US photovoltaic panel production, single-Si wafer       | 4479.2 | 0.1 | 3230.1 | 146.6 | 882.2 | 101.8 | 118.5 |
| 2025 US photovoltaic panel production, single-Si wafer       | 4269.8 | 0.1 | 3038.1 | 144.8 | 800.8 | 100.6 | 185.5 |
| 2030 US photovoltaic panel production, single-Si wafer       | 4119.6 | 0.1 | 2999.7 | 142.5 | 684.0 | 99.4  | 193.9 |
| 2035 US photovoltaic panel production, single-Si wafer       | 4024.6 | 0.1 | 2935.7 | 139.6 | 646.8 | 98.7  | 203.7 |
| 2040 US photovoltaic panel production, single-Si wafer       | 3964.0 | 0.1 | 2914.9 | 136.5 | 613.1 | 97.1  | 202.3 |
| 2045 US photovoltaic panel production, single-Si wafer       | 3911.1 | 0.1 | 2892.8 | 132.7 | 591.9 | 95.8  | 197.7 |
| 2050 US photovoltaic panel production, single-Si wafer       | 3854.8 | 0.1 | 2874.0 | 129.1 | 562.1 | 94.8  | 194.7 |
| 2010 CN photovoltaic panel production, ribbon-Si             | 2885.7 | 0.0 | 2491.3 | 163.2 | 125.7 | 87.6  | 17.7  |
| 2010 DE photovoltaic panel production, ribbon-Si             | 3003.6 | 0.0 | 2190.1 | 71.4  | 611.9 | 68.5  | 61.7  |
| 2010 JP photovoltaic panel production, ribbon-Si             | 3002.4 | 0.0 | 2140.8 | 97.2  | 667.7 | 80.4  | 16.3  |
| 2010 MX photovoltaic panel production, ribbon-Si             | 2787.5 | 0.0 | 2407.8 | 138.6 | 138.2 | 58.5  | 44.5  |
| 2010 MY photovoltaic panel production, ribbon-Si             | 3083.2 | 0.0 | 2824.3 | 83.6  | 84.0  | 80.7  | 10.5  |
| 2010 TW photovoltaic panel production, ribbon-Si             | 3103.0 | 0.0 | 2517.6 | 60.6  | 453.6 | 57.5  | 13.7  |
| 2010 Average Global photovoltaic panel production, ribbon-Si | 3047.6 | 0.0 | 2561.1 | 86.6  | 312.0 | 70.8  | 17.0  |
| 2015 CN photovoltaic panel production, ribbon-Si             | 2831.1 | 0.0 | 2377.2 | 176.7 | 151.2 | 94.5  | 31.5  |
| 2015 JP photovoltaic panel production, ribbon-Si             | 2805.1 | 0.0 | 2465.7 | 103.0 | 126.1 | 92.4  | 17.9  |
| 2015 KR photovoltaic panel production, ribbon-Si             | 3196.3 | 0.0 | 2328.4 | 51.0  | 738.7 | 65.7  | 12.5  |
| 2015 MX photovoltaic panel production, ribbon-Si             | 2763.7 | 0.0 | 2355.5 | 115.6 | 174.0 | 63.1  | 55.5  |
| 2015 MY photovoltaic panel production, ribbon-Si             | 3044.4 | 0.0 | 2766.3 | 109.7 | 84.0  | 73.9  | 10.6  |
| 2015 TW photovoltaic panel production, ribbon-Si             | 3052.7 | 0.0 | 2525.3 | 60.4  | 395.2 | 57.0  | 14.8  |
| 2015 Average Global photovoltaic panel production, ribbon-Si | 2943.1 | 0.0 | 2536.3 | 126.5 | 178.4 | 80.1  | 21.7  |
| 2020 CN photovoltaic panel production, ribbon-Si             | 2788.2 | 0.0 | 2276.4 | 162.8 | 190.5 | 108.4 | 50.1  |
| 2020 KR photovoltaic panel production, ribbon-Si             | 3124.2 | 0.0 | 2288.2 | 51.3  | 687.1 | 82.7  | 14.8  |
| 2020 MY photovoltaic panel production, ribbon-Si             | 2982.4 | 0.0 | 2657.7 | 147.2 | 83.9  | 83.0  | 10.6  |
| 2020 SG photovoltaic panel production, ribbon-Si             | 2680.6 | 0.0 | 2487.0 | 46.7  | 82.8  | 53.8  | 10.3  |
| 2020 TH photovoltaic panel production, ribbon-Si             | 2688.8 | 0.0 | 2461.6 | 65.2  | 85.6  | 54.7  | 21.6  |
| 2020 VN photovoltaic panel production, ribbon-Si             | 2577.2 | 0.0 | 2181.1 | 232.8 | 82.7  | 68.2  | 12.3  |
| 2020 Average Global photovoltaic panel production, ribbon-Si | 2832.9 | 0.0 | 2451.8 | 140.2 | 149.6 | 75.4  | 15.9  |
| 2020 US photovoltaic panel production, ribbon-Si             | 2732.6 | 0.0 | 1960.2 | 93.8  | 535.3 | 71.4  | 71.8  |
| 2025 US photovoltaic panel production, ribbon-Si             | 2604.2 | 0.0 | 1842.4 | 92.7  | 485.4 | 70.7  | 112.9 |
| 2030 US photovoltaic panel production, ribbon-Si             | 2512.0 | 0.0 | 1818.9 | 91.3  | 413.7 | 70.0  | 118.1 |

|                                                                   |        |     |        |       |       |       |       |
|-------------------------------------------------------------------|--------|-----|--------|-------|-------|-------|-------|
| 2035 US photovoltaic panel production, ribbon-Si                  | 2453.8 | 0.0 | 1779.7 | 89.6  | 390.9 | 69.5  | 124.1 |
| 2040 US photovoltaic panel production, ribbon-Si                  | 2416.6 | 0.0 | 1766.9 | 87.6  | 370.2 | 68.5  | 123.3 |
| 2045 US photovoltaic panel production, ribbon-Si                  | 2384.2 | 0.0 | 1753.4 | 85.3  | 357.2 | 67.7  | 120.5 |
| 2050 US photovoltaic panel production, ribbon-Si                  | 2349.6 | 0.0 | 1741.9 | 83.1  | 338.9 | 67.1  | 118.6 |
| 2010 CN photovoltaic panel production, multi-Si wafer             | 3964.0 | 0.1 | 3449.0 | 209.9 | 165.3 | 116.6 | 23.1  |
| 2010 DE photovoltaic panel production, multi-Si wafer             | 4083.4 | 0.0 | 3066.6 | 87.5  | 763.0 | 89.8  | 76.4  |
| 2010 JP photovoltaic panel production, multi-Si wafer             | 4120.4 | 0.1 | 2985.0 | 122.5 | 884.6 | 107.1 | 21.2  |
| 2010 MX photovoltaic panel production, multi-Si wafer             | 3819.1 | 0.0 | 3324.0 | 176.9 | 181.7 | 78.0  | 58.4  |
| 2010 MY photovoltaic panel production, multi-Si wafer             | 4228.5 | 0.1 | 3892.9 | 104.4 | 110.1 | 107.4 | 13.6  |
| 2010 TW photovoltaic panel production, multi-Si wafer             | 4257.9 | 0.1 | 3488.6 | 74.0  | 600.8 | 76.8  | 17.7  |
| 2010 Average Global photovoltaic panel production, multi-Si wafer | 4179.4 | 0.1 | 3545.1 | 108.4 | 409.8 | 94.2  | 21.8  |
| 2015 CN photovoltaic panel production, multi-Si wafer             | 3891.6 | 0.1 | 3297.7 | 227.7 | 199.1 | 125.7 | 41.3  |
| 2015 JP photovoltaic panel production, multi-Si wafer             | 3859.4 | 0.1 | 3416.8 | 130.2 | 165.9 | 123.1 | 23.3  |
| 2015 KR photovoltaic panel production, multi-Si wafer             | 4375.6 | 0.1 | 3232.8 | 61.2  | 977.7 | 87.6  | 16.2  |
| 2015 MX photovoltaic panel production, multi-Si wafer             | 3787.5 | 0.0 | 3254.9 | 146.6 | 228.9 | 84.1  | 73.0  |
| 2015 MY photovoltaic panel production, multi-Si wafer             | 4177.1 | 0.1 | 3816.0 | 138.9 | 110.0 | 98.4  | 13.6  |
| 2015 TW photovoltaic panel production, multi-Si wafer             | 4191.2 | 0.1 | 3499.0 | 73.7  | 523.2 | 76.0  | 19.2  |
| 2015 Average Global photovoltaic panel production, multi-Si wafer | 4040.9 | 0.1 | 3509.2 | 161.3 | 235.2 | 106.7 | 28.4  |
| 2020 CN photovoltaic panel production, multi-Si wafer             | 3834.6 | 0.1 | 3164.1 | 209.2 | 251.1 | 144.2 | 66.0  |
| 2020 KR photovoltaic panel production, multi-Si wafer             | 4280.4 | 0.1 | 3179.8 | 61.6  | 909.5 | 110.1 | 19.3  |
| 2020 MY photovoltaic panel production, multi-Si wafer             | 4094.9 | 0.1 | 3672.2 | 188.7 | 109.9 | 110.5 | 13.6  |
| 2020 SG photovoltaic panel production, multi-Si wafer             | 3702.7 | 0.0 | 3453.6 | 55.5  | 108.5 | 71.9  | 13.2  |
| 2020 TH photovoltaic panel production, multi-Si wafer             | 3705.5 | 0.0 | 3411.9 | 80.0  | 112.2 | 73.1  | 28.3  |
| 2020 VN photovoltaic panel production, multi-Si wafer             | 3556.2 | 0.0 | 3039.2 | 301.8 | 108.3 | 90.9  | 16.0  |
| 2020 Average Global photovoltaic panel production, multi-Si wafer | 3896.1 | 0.1 | 3398.8 | 179.3 | 197.0 | 100.5 | 20.6  |
| 2020 US photovoltaic panel production, multi-Si wafer             | 3748.2 | 0.0 | 2732.1 | 117.9 | 708.2 | 95.1  | 94.8  |
| 2025 US photovoltaic panel production, multi-Si wafer             | 3578.2 | 0.0 | 2576.1 | 116.4 | 642.1 | 94.1  | 149.3 |
| 2030 US photovoltaic panel production, multi-Si wafer             | 3456.3 | 0.0 | 2545.1 | 114.6 | 547.1 | 93.2  | 156.2 |
| 2035 US photovoltaic panel production, multi-Si wafer             | 3379.4 | 0.0 | 2493.2 | 112.3 | 517.0 | 92.6  | 164.2 |
| 2040 US photovoltaic panel production, multi-Si wafer             | 3330.2 | 0.0 | 2476.5 | 109.7 | 489.6 | 91.3  | 163.1 |
| 2045 US photovoltaic panel production, multi-Si wafer             | 3287.3 | 0.0 | 2458.6 | 106.7 | 472.4 | 90.3  | 159.4 |

|                                                       |        |     |        |       |       |      |       |
|-------------------------------------------------------|--------|-----|--------|-------|-------|------|-------|
| 2050 US photovoltaic panel production, multi-Si wafer | 3241.6 | 0.0 | 2443.3 | 103.7 | 448.1 | 89.5 | 156.9 |
|-------------------------------------------------------|--------|-----|--------|-------|-------|------|-------|



Table S5 presents the original EPBT and carbon emission factor estimated results without normalization of all outsourced cases and reshored scenarios. EPBT, the time needed to generate as much energy as consumed during the production stages, is an essential metric adopted widely in characterizing the energy sustainability of PV technologies. EPBT is dominated by energy embedded in raw materials and energy consumed in manufacturing products. EROI, the amount of energy expended to produce a certain amount of energy, is another critical metric proportional to the inverse of EPBT. Besides metrics that describe the energy use, the carbon emission factor or life cycle carbon emission factor, the total amount of GHG emission mainly induced from material production and PV manufacturing is also a crucial metric describing the climate change impact of the PV system. When calculating these metrics, we account for the geographical and temporal influence on input parameters, including solar irradiation, module efficiency, etc.

**Table S5. Original EPBT and carbon emission factor results (without normalization)**

| Case / Scenario                    | Technology | EPBT (years) | EROI | Carbon Emission Factor (kg CO <sub>2</sub> per kWh) |
|------------------------------------|------------|--------------|------|-----------------------------------------------------|
| 2010 Outsourced Case (China)       | sc-Si      | 2.07         | 14.5 | 69.3                                                |
| 2010 Outsourced Case (Germany)     | sc-Si      | 2.14         | 14.0 | 51.3                                                |
| 2010 Outsourced Case (Japan)       | sc-Si      | 2.16         | 13.9 | 48.5                                                |
| 2010 Outsourced Case (Mexico)      | sc-Si      | 2.00         | 15.0 | 50.8                                                |
| 2010 Outsourced Case (Malaysia)    | sc-Si      | 2.22         | 13.5 | 61.9                                                |
| 2010 Outsourced Case (Taiwan)      | sc-Si      | 2.23         | 13.5 | 60.7                                                |
| 2010 Outsourced Case               | sc-Si      | 2.19         | 13.7 | 60.9                                                |
| 2015 Outsourced Case (China)       | sc-Si      | 1.68         | 17.9 | 53.9                                                |
| 2015 Outsourced Case (Japan)       | sc-Si      | 1.66         | 18.1 | 45.7                                                |
| 2015 Outsourced Case (South Korea) | sc-Si      | 1.89         | 15.9 | 44.3                                                |
| 2015 Outsourced Case (Mexico)      | sc-Si      | 1.63         | 18.3 | 40.4                                                |
| 2015 Outsourced Case (Malaysia)    | sc-Si      | 1.80         | 16.6 | 51.7                                                |
| 2015 Outsourced Case (Taiwan)      | sc-Si      | 1.81         | 16.6 | 49.3                                                |
| 2015 Outsourced Case               | sc-Si      | 1.74         | 17.2 | 50.8                                                |
| 2020 Outsourced Case (China)       | sc-Si      | 1.37         | 21.9 | 42.5                                                |
| 2020 Outsourced Case (South Korea) | sc-Si      | 1.53         | 19.6 | 35.7                                                |
| 2020 Outsourced Case (Malaysia)    | sc-Si      | 1.46         | 20.5 | 42.3                                                |
| 2020 Outsourced Case (Singapore)   | sc-Si      | 1.32         | 22.8 | 30.5                                                |
| 2020 Outsourced Case (Thailand)    | sc-Si      | 1.32         | 22.7 | 36.4                                                |
| 2020 Outsourced Case (Vietnam)     | sc-Si      | 1.27         | 23.7 | 35.5                                                |
| 2020 Outsourced Case               | sc-Si      | 1.39         | 21.6 | 38.8                                                |
| 2020 Reshored Scenario             | sc-Si      | 1.34         | 22.4 | 29.7                                                |
| 2025 Reshored Scenario             | sc-Si      | 1.28         | 23.5 | 27.9                                                |
| 2030 Reshored Scenario             | sc-Si      | 1.23         | 24.4 | 27.5                                                |
| 2035 Reshored Scenario             | sc-Si      | 1.20         | 24.9 | 26.8                                                |
| 2040 Reshored Scenario             | sc-Si      | 1.18         | 25.3 | 26.4                                                |

|                                    |       |      |      |      |
|------------------------------------|-------|------|------|------|
| 2045 Reshored Scenario             | sc-Si | 1.17 | 25.7 | 26.1 |
| 2050 Reshored Scenario             | sc-Si | 1.15 | 26.0 | 25.8 |
| 2010 Outsourced Case (China)       | r-Si  | 1.61 | 18.7 | 55.3 |
| 2010 Outsourced Case (Germany)     | r-Si  | 1.67 | 17.9 | 41.3 |
| 2010 Outsourced Case (Japan)       | r-Si  | 1.67 | 17.9 | 39.1 |
| 2010 Outsourced Case (Mexico)      | r-Si  | 1.55 | 19.3 | 40.9 |
| 2010 Outsourced Case (Malaysia)    | r-Si  | 1.72 | 17.5 | 49.5 |
| 2010 Outsourced Case (Taiwan)      | r-Si  | 1.73 | 17.4 | 48.6 |
| 2010 Outsourced Case               | r-Si  | 1.70 | 17.7 | 48.7 |
| 2015 Outsourced Case (China)       | r-Si  | 1.33 | 22.5 | 44.3 |
| 2015 Outsourced Case (Japan)       | r-Si  | 1.32 | 22.7 | 37.7 |
| 2015 Outsourced Case (South Korea) | r-Si  | 1.51 | 19.9 | 36.6 |
| 2015 Outsourced Case (Mexico)      | r-Si  | 1.30 | 23.0 | 33.5 |
| 2015 Outsourced Case (Malaysia)    | r-Si  | 1.43 | 20.9 | 42.5 |
| 2015 Outsourced Case (Taiwan)      | r-Si  | 1.44 | 20.8 | 40.6 |
| 2015 Outsourced Case               | r-Si  | 1.39 | 21.6 | 41.8 |
| 2020 Outsourced Case (China)       | r-Si  | 1.14 | 26.3 | 36.5 |
| 2020 Outsourced Case (South Korea) | r-Si  | 1.28 | 23.5 | 30.8 |
| 2020 Outsourced Case (Malaysia)    | r-Si  | 1.22 | 24.6 | 36.3 |
| 2020 Outsourced Case (Singapore)   | r-Si  | 1.10 | 27.4 | 26.5 |
| 2020 Outsourced Case (Thailand)    | r-Si  | 1.10 | 27.3 | 31.4 |
| 2020 Outsourced Case (Vietnam)     | r-Si  | 1.05 | 28.5 | 30.7 |
| 2020 Outsourced Case               | r-Si  | 1.16 | 25.9 | 33.4 |
| 2020 Reshored Scenario             | r-Si  | 1.12 | 26.9 | 25.9 |
| 2025 Reshored Scenario             | r-Si  | 1.06 | 28.2 | 24.3 |
| 2030 Reshored Scenario             | r-Si  | 1.03 | 29.2 | 24.0 |
| 2035 Reshored Scenario             | r-Si  | 1.00 | 29.9 | 23.4 |
| 2040 Reshored Scenario             | r-Si  | 0.99 | 30.4 | 23.1 |
| 2045 Reshored Scenario             | r-Si  | 0.97 | 30.8 | 22.8 |
| 2050 Reshored Scenario             | r-Si  | 0.96 | 31.3 | 22.6 |
| 2010 Outsourced Case (China)       | mc-Si | 1.87 | 16.1 | 61.9 |
| 2010 Outsourced Case (Germany)     | mc-Si | 1.92 | 15.6 | 47.1 |
| 2010 Outsourced Case (Japan)       | mc-Si | 1.94 | 15.4 | 43.8 |
| 2010 Outsourced Case (Mexico)      | mc-Si | 1.80 | 16.7 | 45.6 |
| 2010 Outsourced Case (Malaysia)    | mc-Si | 1.99 | 15.1 | 55.4 |
| 2010 Outsourced Case (Taiwan)      | mc-Si | 2.01 | 14.9 | 54.5 |
| 2010 Outsourced Case               | mc-Si | 1.97 | 15.2 | 54.6 |
| 2015 Outsourced Case (China)       | mc-Si | 1.49 | 20.1 | 47.6 |
| 2015 Outsourced Case (Japan)       | mc-Si | 1.48 | 20.3 | 40.5 |
| 2015 Outsourced Case (South Korea) | mc-Si | 1.68 | 17.9 | 39.3 |
| 2015 Outsourced Case (Mexico)      | mc-Si | 1.45 | 20.7 | 35.9 |
| 2015 Outsourced Case (Malaysia)    | mc-Si | 1.60 | 18.8 | 45.7 |
| 2015 Outsourced Case (Taiwan)      | mc-Si | 1.61 | 18.7 | 43.7 |

|                                    |       |      |      |      |
|------------------------------------|-------|------|------|------|
| 2015 Outsourced Case               | mc-Si | 1.55 | 19.4 | 44.9 |
| 2020 Outsourced Case (China)       | mc-Si | 1.31 | 23.0 | 40.2 |
| 2020 Outsourced Case (South Korea) | mc-Si | 1.46 | 20.6 | 34.0 |
| 2020 Outsourced Case (Malaysia)    | mc-Si | 1.39 | 21.5 | 40.1 |
| 2020 Outsourced Case (Singapore)   | mc-Si | 1.26 | 23.8 | 29.3 |
| 2020 Outsourced Case (Thailand)    | mc-Si | 1.26 | 23.8 | 34.6 |
| 2020 Outsourced Case (Vietnam)     | mc-Si | 1.21 | 24.8 | 33.8 |
| 2020 Outsourced Case               | mc-Si | 1.33 | 22.6 | 36.8 |
| 2020 Reshored Scenario             | mc-Si | 1.28 | 23.5 | 28.4 |
| 2025 Reshored Scenario             | mc-Si | 1.22 | 24.6 | 26.7 |
| 2030 Reshored Scenario             | mc-Si | 1.18 | 25.5 | 26.3 |
| 2035 Reshored Scenario             | mc-Si | 1.15 | 26.1 | 25.7 |
| 2040 Reshored Scenario             | mc-Si | 1.13 | 26.5 | 25.4 |
| 2045 Reshored Scenario             | mc-Si | 1.12 | 26.8 | 25.0 |
| 2050 Reshored Scenario             | mc-Si | 1.10 | 27.2 | 24.8 |

---

## Supplementary References

1. International Trade Commission *Crystalline Silicon Photovoltaic Cells, Whether or Not Partially or Fully Assembled Into Other Products* (2021). (Accessed 10/30/2021).
2. Wang, M. et al. Breaking down barriers on PV trade will facilitate global carbon mitigation. *Nature Communications* **12**, 6820 (2021).
3. Goldthau, A. & Hughes, L. Protect global supply chains for low-carbon technologies. *Nature* **585**, 28-30 (2020).
4. Fthenakis, V. & Leccisi, E. Updated sustainability status of crystalline silicon - based photovoltaic systems: Life - cycle energy and environmental impact reduction trends. *Progress in Photovoltaics: Research and Applications* **29**, 1068-1077 (2021).
5. Fthenakis, V., Kim, H. C., Held, M., Raugei, M. & Krones, J. Update of PV energy payback times and life-cycle greenhouse gas emissions. *24th European Photovoltaic Solar Energy Conference and Exhibition* 21-25 (2009).
6. Rabaia, M. K. H. et al. Environmental impacts of solar energy systems: A review. *Science of The Total Environment* **754**, 141989 (2021).
7. Fu, Y., Liu, X. & Yuan, Z. Life-cycle assessment of multi-crystalline photovoltaic (PV) systems in China. *Journal of Cleaner Production* **86**, 180-190 (2015).
8. World Energy Outlook 2020. (International Energy Agency, 2020).
9. Annual Energy Outlook 2021. (U.S. Energy Information Administration, U.S. Department of Energy, 2021).
10. Forster, P. et al. *Changes in atmospheric constituents and in radiative forcing*. Vol. **39** (2007).
11. Pearce, W., Holmberg, K., Hellsten, I. & Nerlich, B. Climate change on Twitter: Topics, communities and conversations about the 2013 IPCC Working Group 1 report. *PloS one* **9**, e94785 (2014).
